# Supplementary material for: The U2AF1S34F mutation induces lineage-specific splicing alterations in myelodysplastic syndromes
Source: J Clin Invest. 2017 Apr 24;127(6):2206–21. doi: 10.1172/JCI91363 (PMC5451246; doi:10.1172/JCI91363)
Supplement: Supplemental data [file jci-127-91363-s001.pdf]

# **The *U2AF1*<sup>S34F</sup> mutation induces lineage-specific splicing alterations in myelodysplastic syndromes**

Bon Ham Yip, Violetta Steeples, Emmanouela Repapi, Richard N. Armstrong, Miriam Llorian, Swagata Roy, Jacqueline Shaw, Hamid Dolatshad, Stephen Taylor, Amit Verma, Matthias Bartenstein, Paresh Vyas, Nicholas C. P. Cross, Luca Malcovati, Mario Cazzola, Eva Hellström-Lindberg, Seishi Ogawa, Christopher W. J. Smith, Andrea Pellagatti, Jacqueline Boulton

## **Supplementary Information**

## **Supplemental Methods**

### **Real-time quantitative PCR**

The expression level of *U2AF1* was determined by real-time quantitative PCR. The  $\beta$ 2-microglobulin gene was used to normalize for differences in input cDNA. Pre-developed TaqMan Assays were used (Assays-on-Demand, Applied Biosystems, Foster City, CA, USA) and reactions were run on a LightCycler 96 Real-Time PCR System (Roche). Each sample was run in triplicate and the expression ratios were calculated using the  $\Delta\Delta C_T$  method.

### **Western blot**

Western blot was performed using the Invitrogen NuPage Novex 4–12% Bis-Tris Gels as previously described (1). Anti-FLAG M2-Peroxidase (HRP) antibody (Sigma Aldrich), anti-U2AF35 antibody (Abcam ab86305), anti-ITGB3BP antibody (HPA028463; Atlas antibodies), and anti-beta actin antibody (HRP) (Abcam ab197277) at 1:2500, 1:2000, 1:500 and 1:30000 dilution respectively were used.

### **Cell Growth Assay**

Transduced cells on day 8 were seeded into 96-well plates (20,000 cells/0.2 mL) and viable cell counts were determined by trypan blue exclusion for 6 consecutive days. Medium was replenished every second day to maintain the same volume.

### **May-Grünwald-Giemsa staining**

Cytospin slides of cultured granulomonocytic cells were prepared and stained with May-Grünwald and Giemsa solution according to the manufacturer's instructions (Sigma Aldrich).

## Pyrosequencing

PCR and Sequencing primers were designed using PyroMark Assay Design 2.0 software and are shown in Supplemental Table 1. PCR of colony cDNA was performed with the PyroMark PCR kit (Qiagen) using the standard component mix (1.5mM MgCl<sub>2</sub>) and thermocycling conditions (55°C annealing temperature). Pyrosequencing was performed on a PyroMark Q24 instrument (Qiagen) according to the manufacturer's recommendations.

## SYBR green real-time qPCR

Primers described in Park et al. (2) were used to perform a SYBR green real-time qPCR to assess ATG7 polyadenylation site usage. Samples were run on a Roche Lightcycler 96 using Roche lightcycler 480 SYBR green I master according to the manufacturer's protocol.

## Cloning and Sanger sequencing

The coding sequence of the *H2AFY* and *STRAP* genes were amplified from cDNA obtained from erythroid and granulomonocytic colonies by PCR using Phusion high fidelity DNA polymerase (NEB). PCR products were purified using a QIA quick gel extraction kit (Qiagen) and A tailed using Maxima hot start PCR mastermix. PCR products were inserted into the pCR4-TOPO vector using a TOPO TA Cloning Kit (Life technologies) and transformed in DH5α chemically competent cells (Life technologies). These were grown at 37 °C on LB Agar plates supplemented with 100 µg/ml ampicillin (Sigma). Individual colonies were picked and expanded in LB medium with 100 µg/ml ampicillin, and plasmid DNA was then extracted using a Qiaprep spin miniprep kit (Qiagen). Plasmid insert sequences were obtained by Sanger sequencing (Source Bioscience) using M13F and M13R primers.

## References

1. Yip BH, et al. Effects of L-leucine in 5q- syndrome and other RPS14-deficient erythroblasts. *Leukemia*. 2012;26(9):2154-2158.
2. Park SM, et al. U2AF35(S34F) Promotes Transformation by Directing Aberrant ATG7 Pre-mRNA 3' End Formation. *Mol Cell*. 2016;62(4):479-490.

Supplemental Figure 1

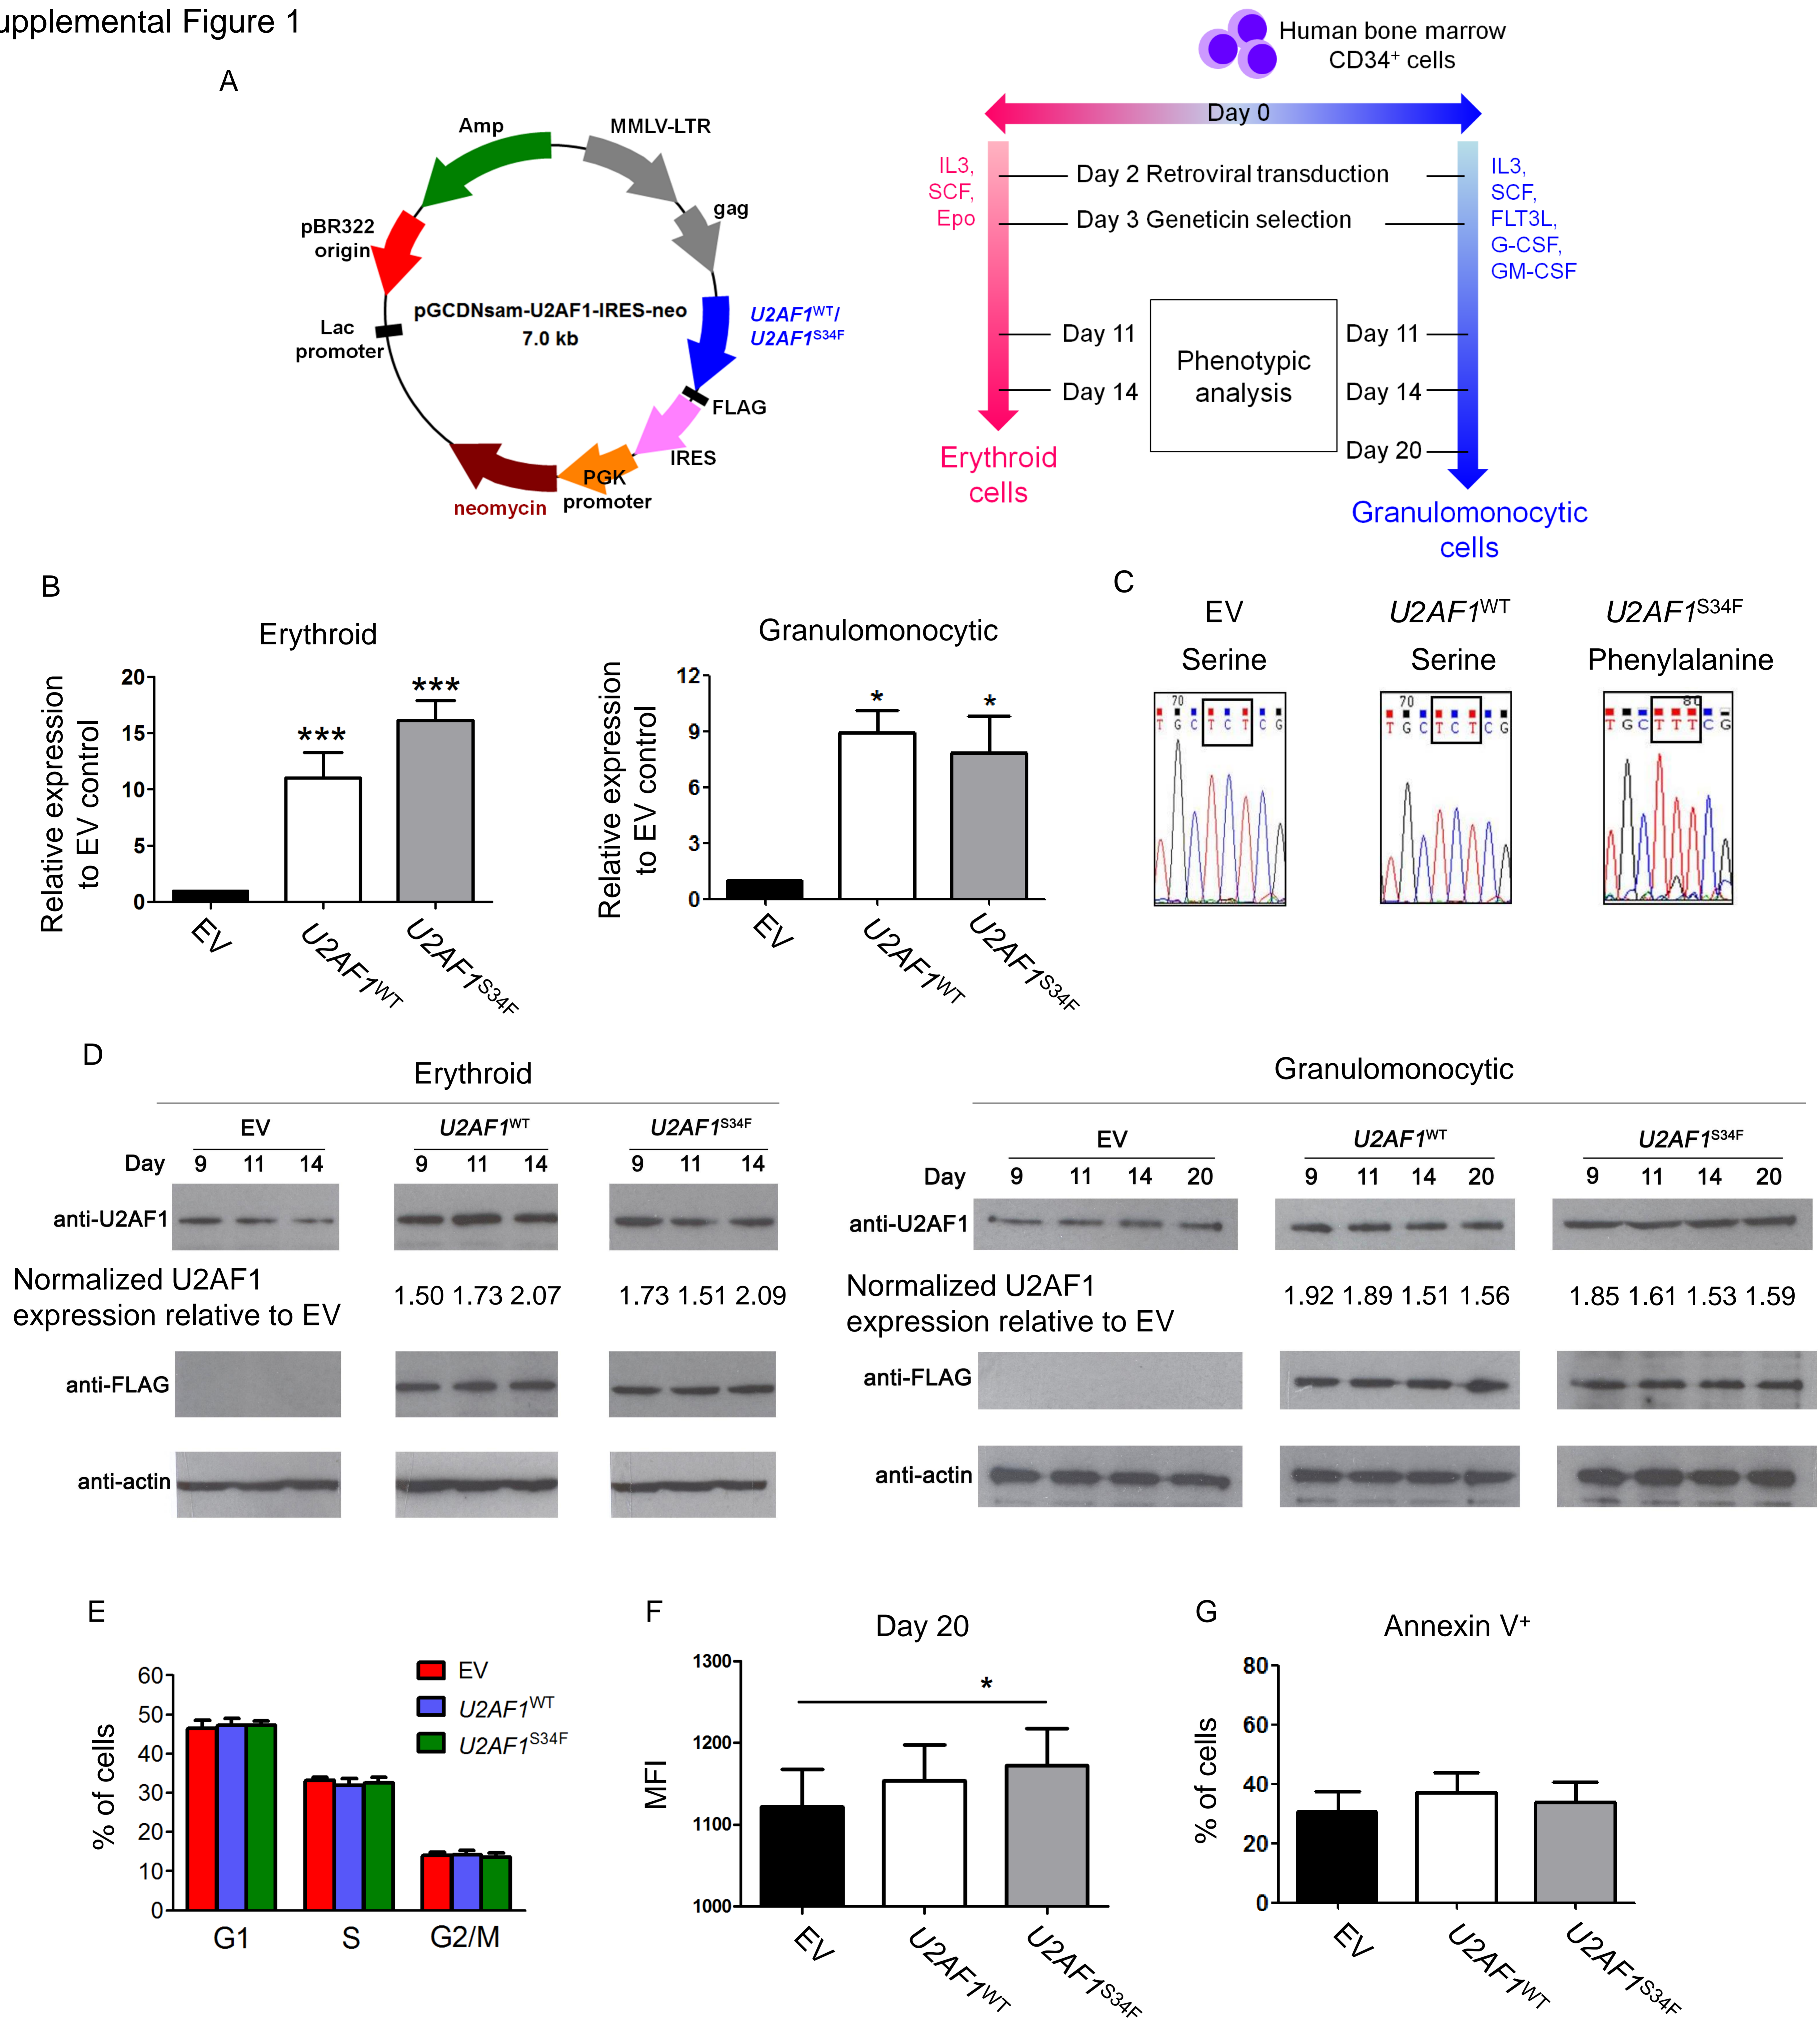

**Supplemental Figure 1. Expression of *U2AF1*<sup>WT</sup> and *U2AF1*<sup>S34F</sup> in hematopoietic CD34<sup>+</sup> progenitors.** (A) Schematic diagram showing the retroviral pGCDNsam-IRES-neomycin plasmids containing *U2AF1*<sup>WT</sup> or *U2AF1*<sup>S34F</sup> cDNA (left). Schematic diagram showing the culture conditions used to obtain erythroid and granulomonocytic cells following retroviral transduction of a plasmid expressing *U2AF1*<sup>WT</sup> or *U2AF1*<sup>S34F</sup> cDNA into hematopoietic progenitors (right). (B) Taqman qRT-PCR to determine the relative expression levels of *U2AF1*<sup>WT</sup> or *U2AF1*<sup>S34F</sup> transcripts in transduced cells differentiating towards erythroid and granulomonocytic cells harvested on Day 11. Results in each bar graph were obtained from 6 independent experiments. (C) Sanger sequencing of cDNA from transduced cells confirming the expression of the *U2AF1*<sup>S34F</sup> mutation. (D) Expression of *U2AF1*<sup>WT</sup> and *U2AF1*<sup>S34F</sup> at different time points in transduced erythroid and granulomonocytic cells in culture. Quantification of protein expression levels was performed by ImageJ. (E) Cell cycle analysis of transduced erythroid cells expressing *U2AF1*<sup>WT</sup> or *U2AF1*<sup>S34F</sup> on day 11 of culture. Results were obtained from 6 independent experiments. (F) Granulomonocytic differentiation in transduced granulomonocytic cells expressing *U2AF1*<sup>WT</sup> or *U2AF1*<sup>S34F</sup>. Median fluorescence intensity (MFI) of forward scatter (as a measure of cell size) of transduced granulomonocytic cells expressing *U2AF1*<sup>WT</sup> or *U2AF1*<sup>S34F</sup> on day 20 of culture. Results were obtained from 5 independent experiments. (G) Apoptosis in transduced granulomonocytic cells expressing *U2AF1*<sup>WT</sup> or *U2AF1*<sup>S34F</sup>. Apoptosis was measured by Annexin V staining and flow cytometry in transduced granulomonocytic cells expressing *U2AF1*<sup>WT</sup> or *U2AF1*<sup>S34F</sup> on day 11 of culture. Results were obtained from 7 independent experiments. Bar graphs show mean+SEM. \**P*<0.05, \*\**P*<0.01 and \*\*\**P*<0.001, 1-way ANOVA with repeated measures using Tukey's post-test.

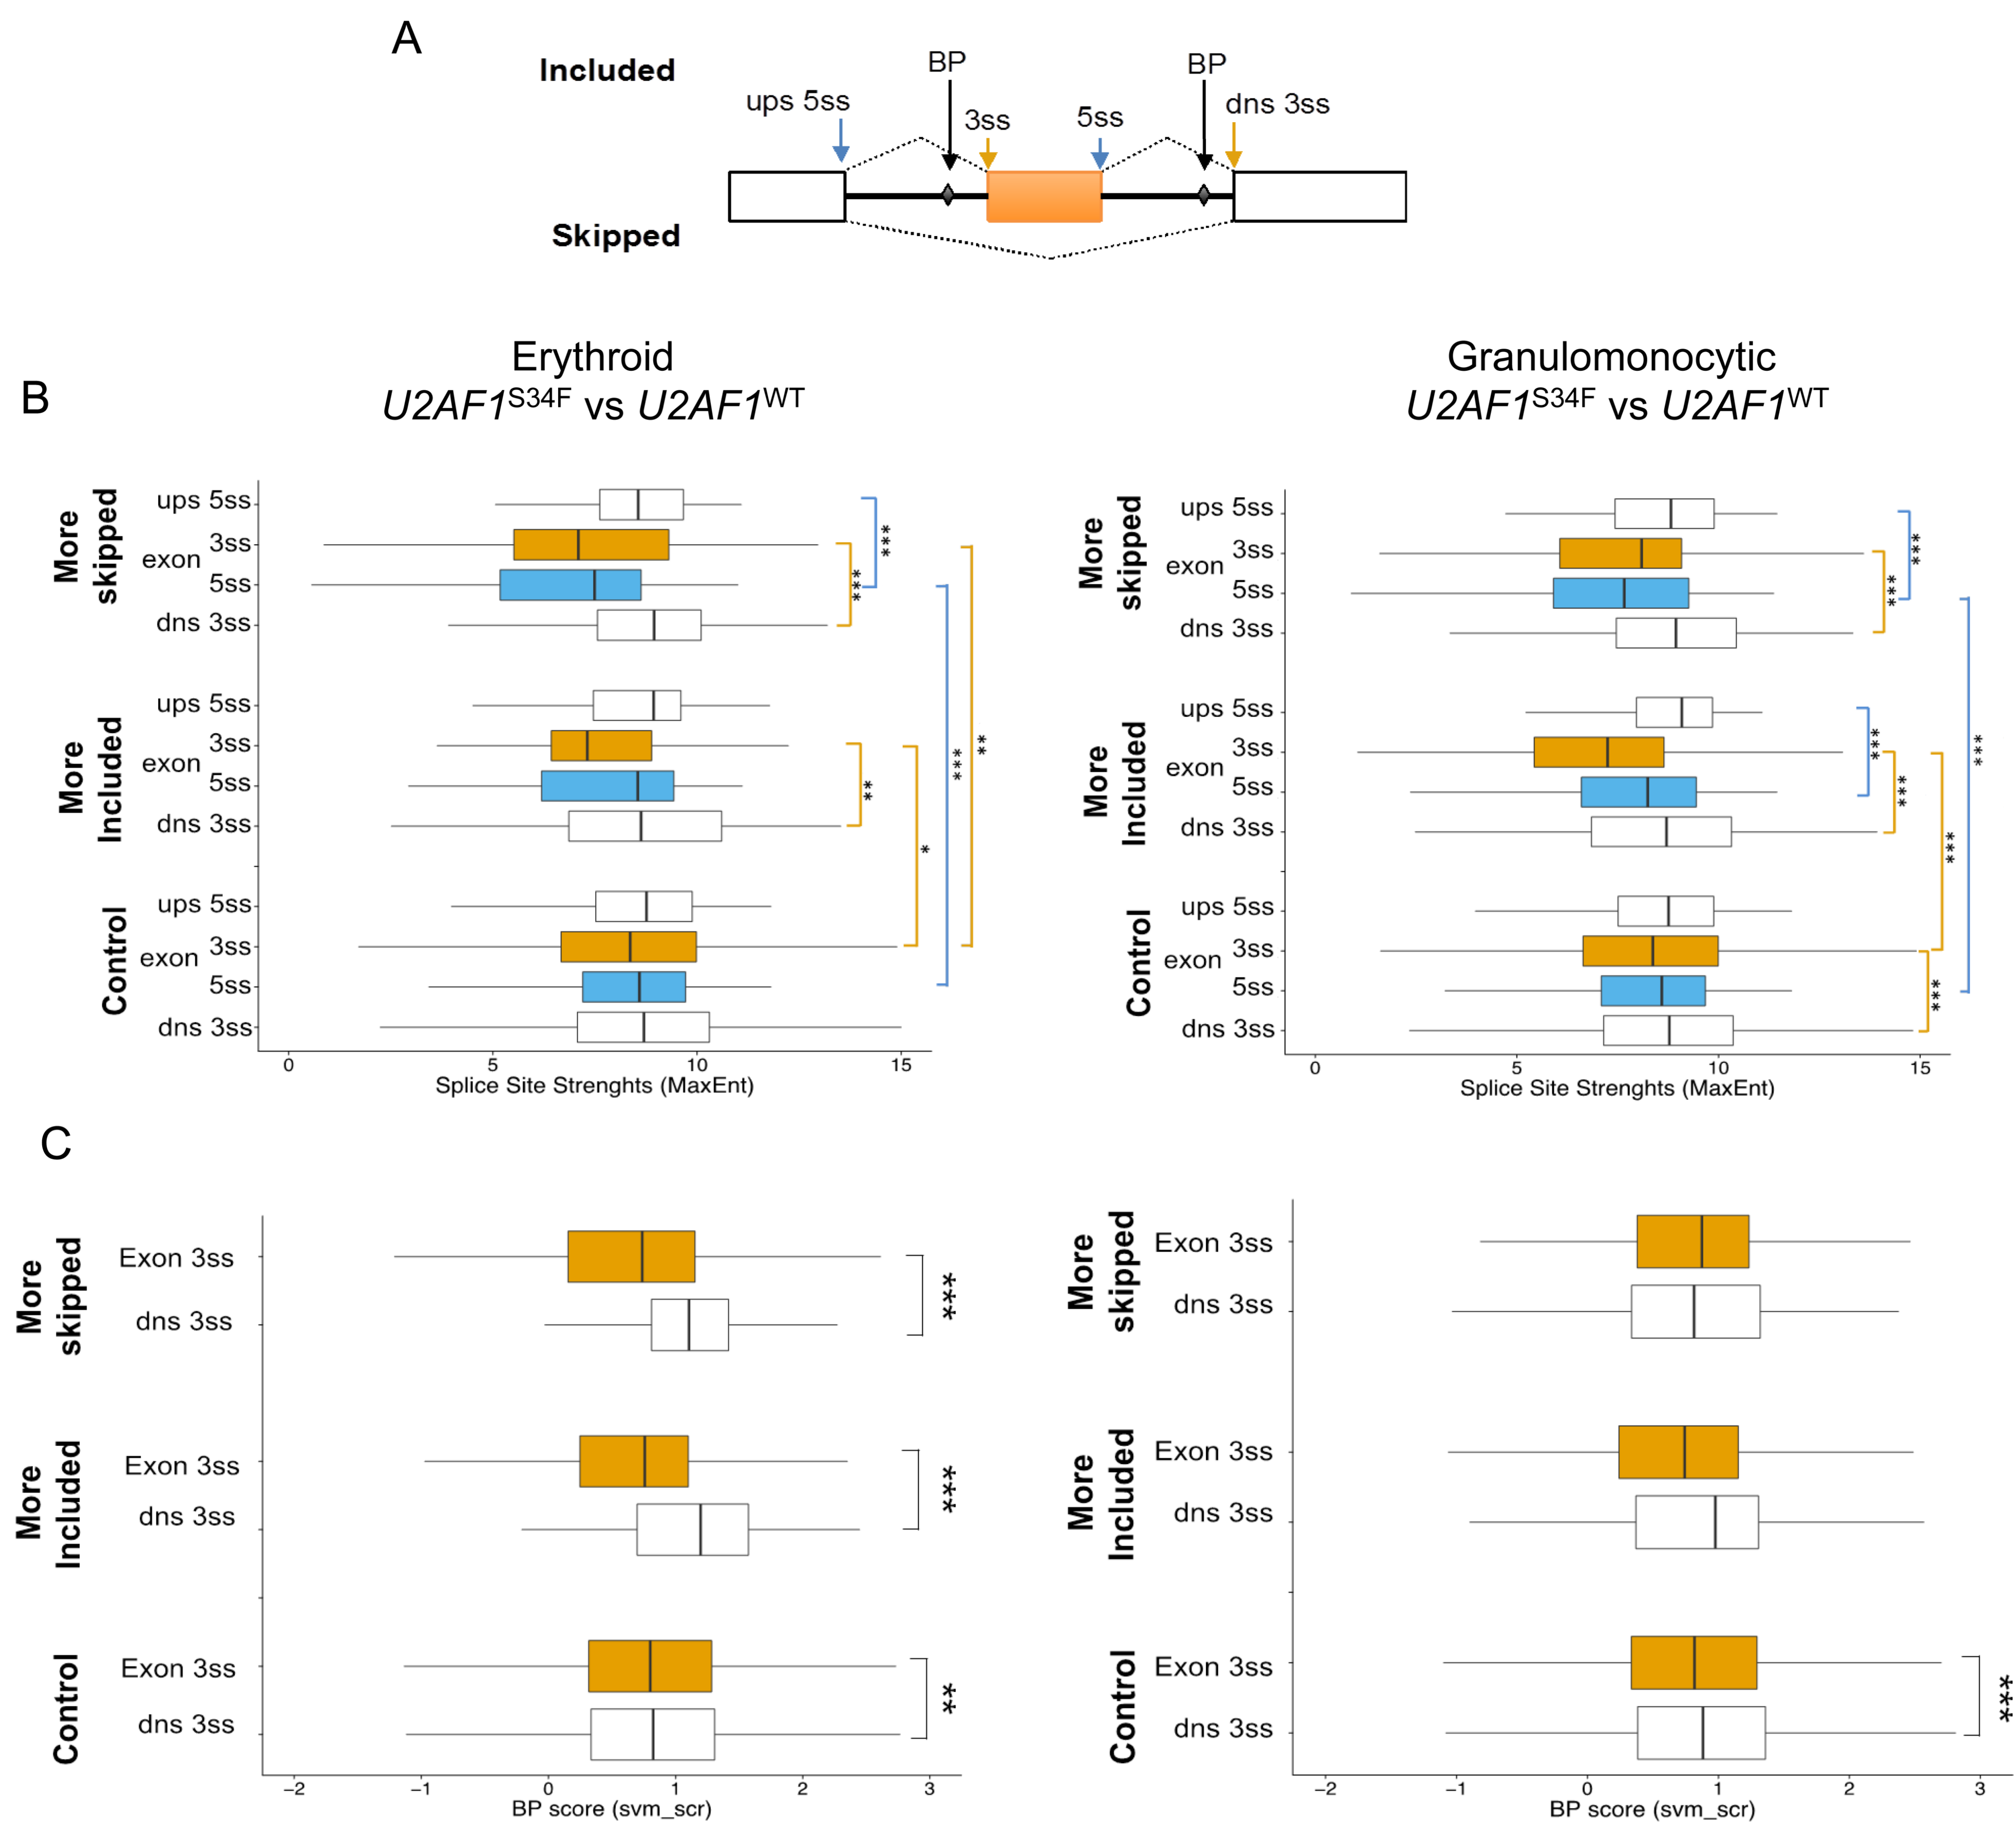

**Supplemental Figure 2. Splice site strengths and BP scores for cassette exons regulated by *U2AF1*<sup>S34F</sup>.** (A) Schematic representation of cassette exons (orange) and locations of the different features analyzed. (B) Splice site strength and (C) BP scores were determined for the different data sets: Exons more Included, more Skipped upon *U2AF1*<sup>S34F</sup> overexpression and non regulated SE control exons. For each data set, splice site scores (B) or BP scores (C) are plotted; 5'ss (blue), 3'ss (orange), upstream 5'ss (white) and downstream 3'ss (white). Boxplot's whiskers represent 1.5 IQR and outliers are not shown. Statistically significant differences (Kruskal-Wallis followed by Mann-Whitney U tests with Bonferroni correction) are marked, p-value < 0.05 (\*), p-value< 0.01 (\*\*), p-value <0.001(\*\*\*), and lines are colored to show comparisons between 3'ss (orange) or 5'ss (blue).

A

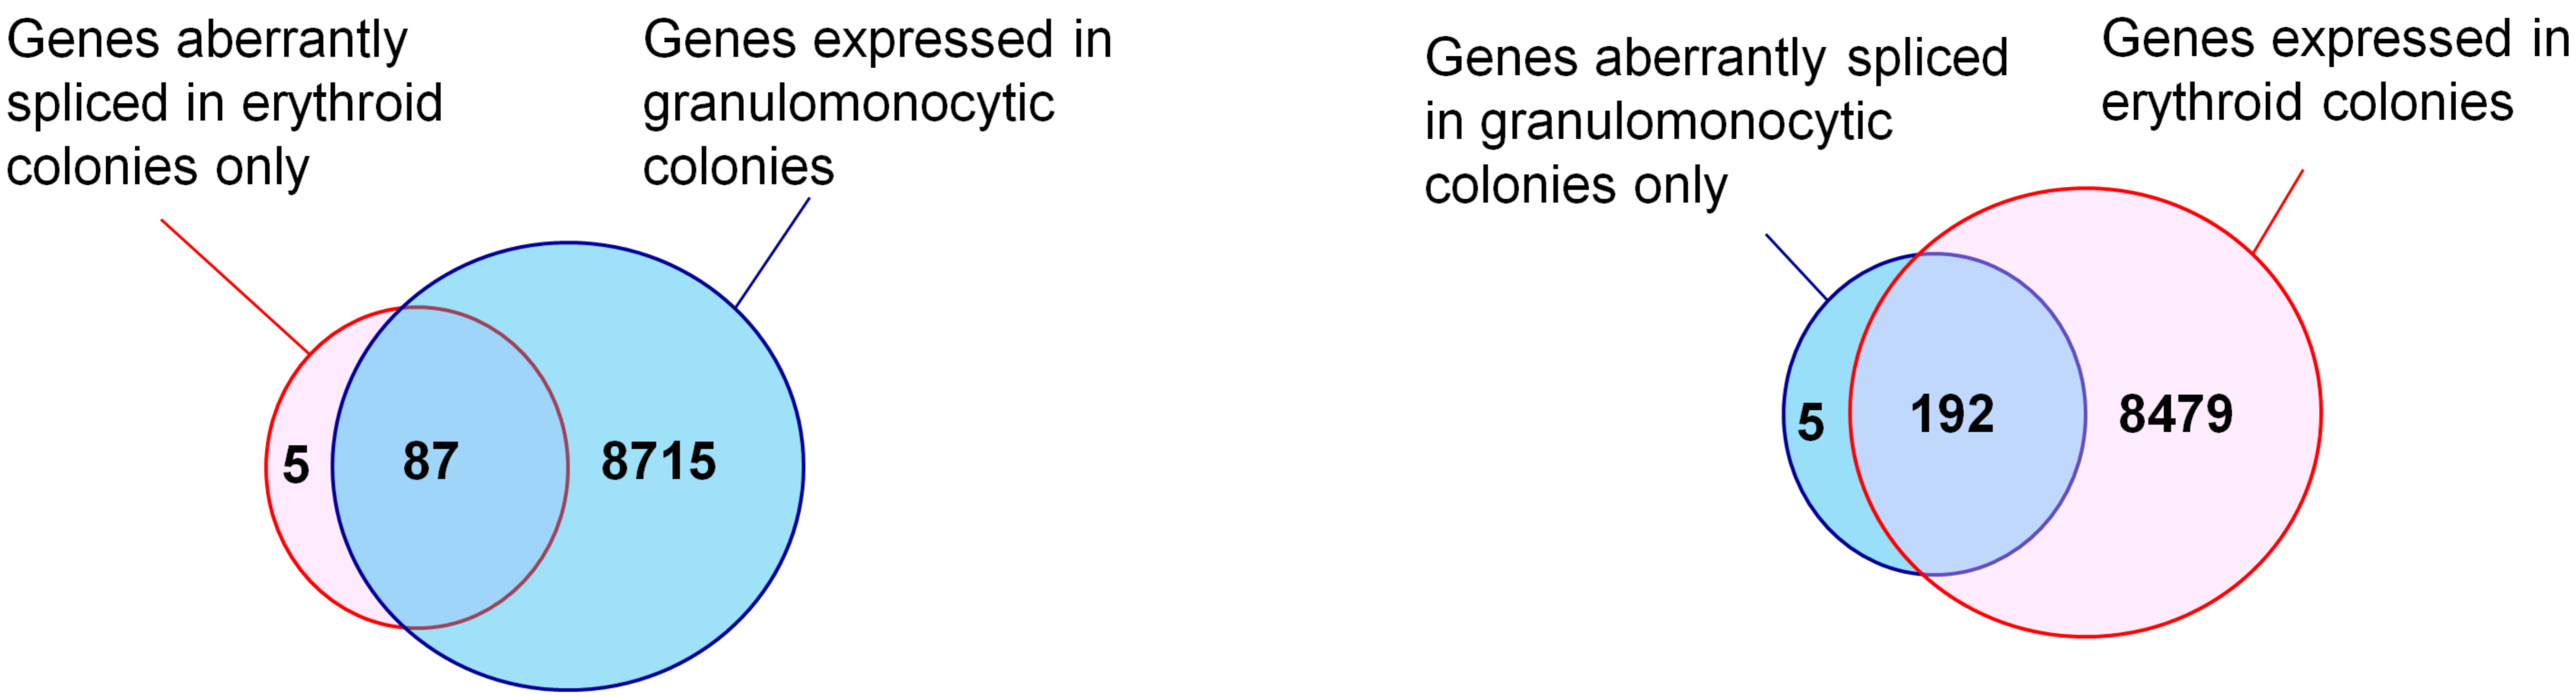

B

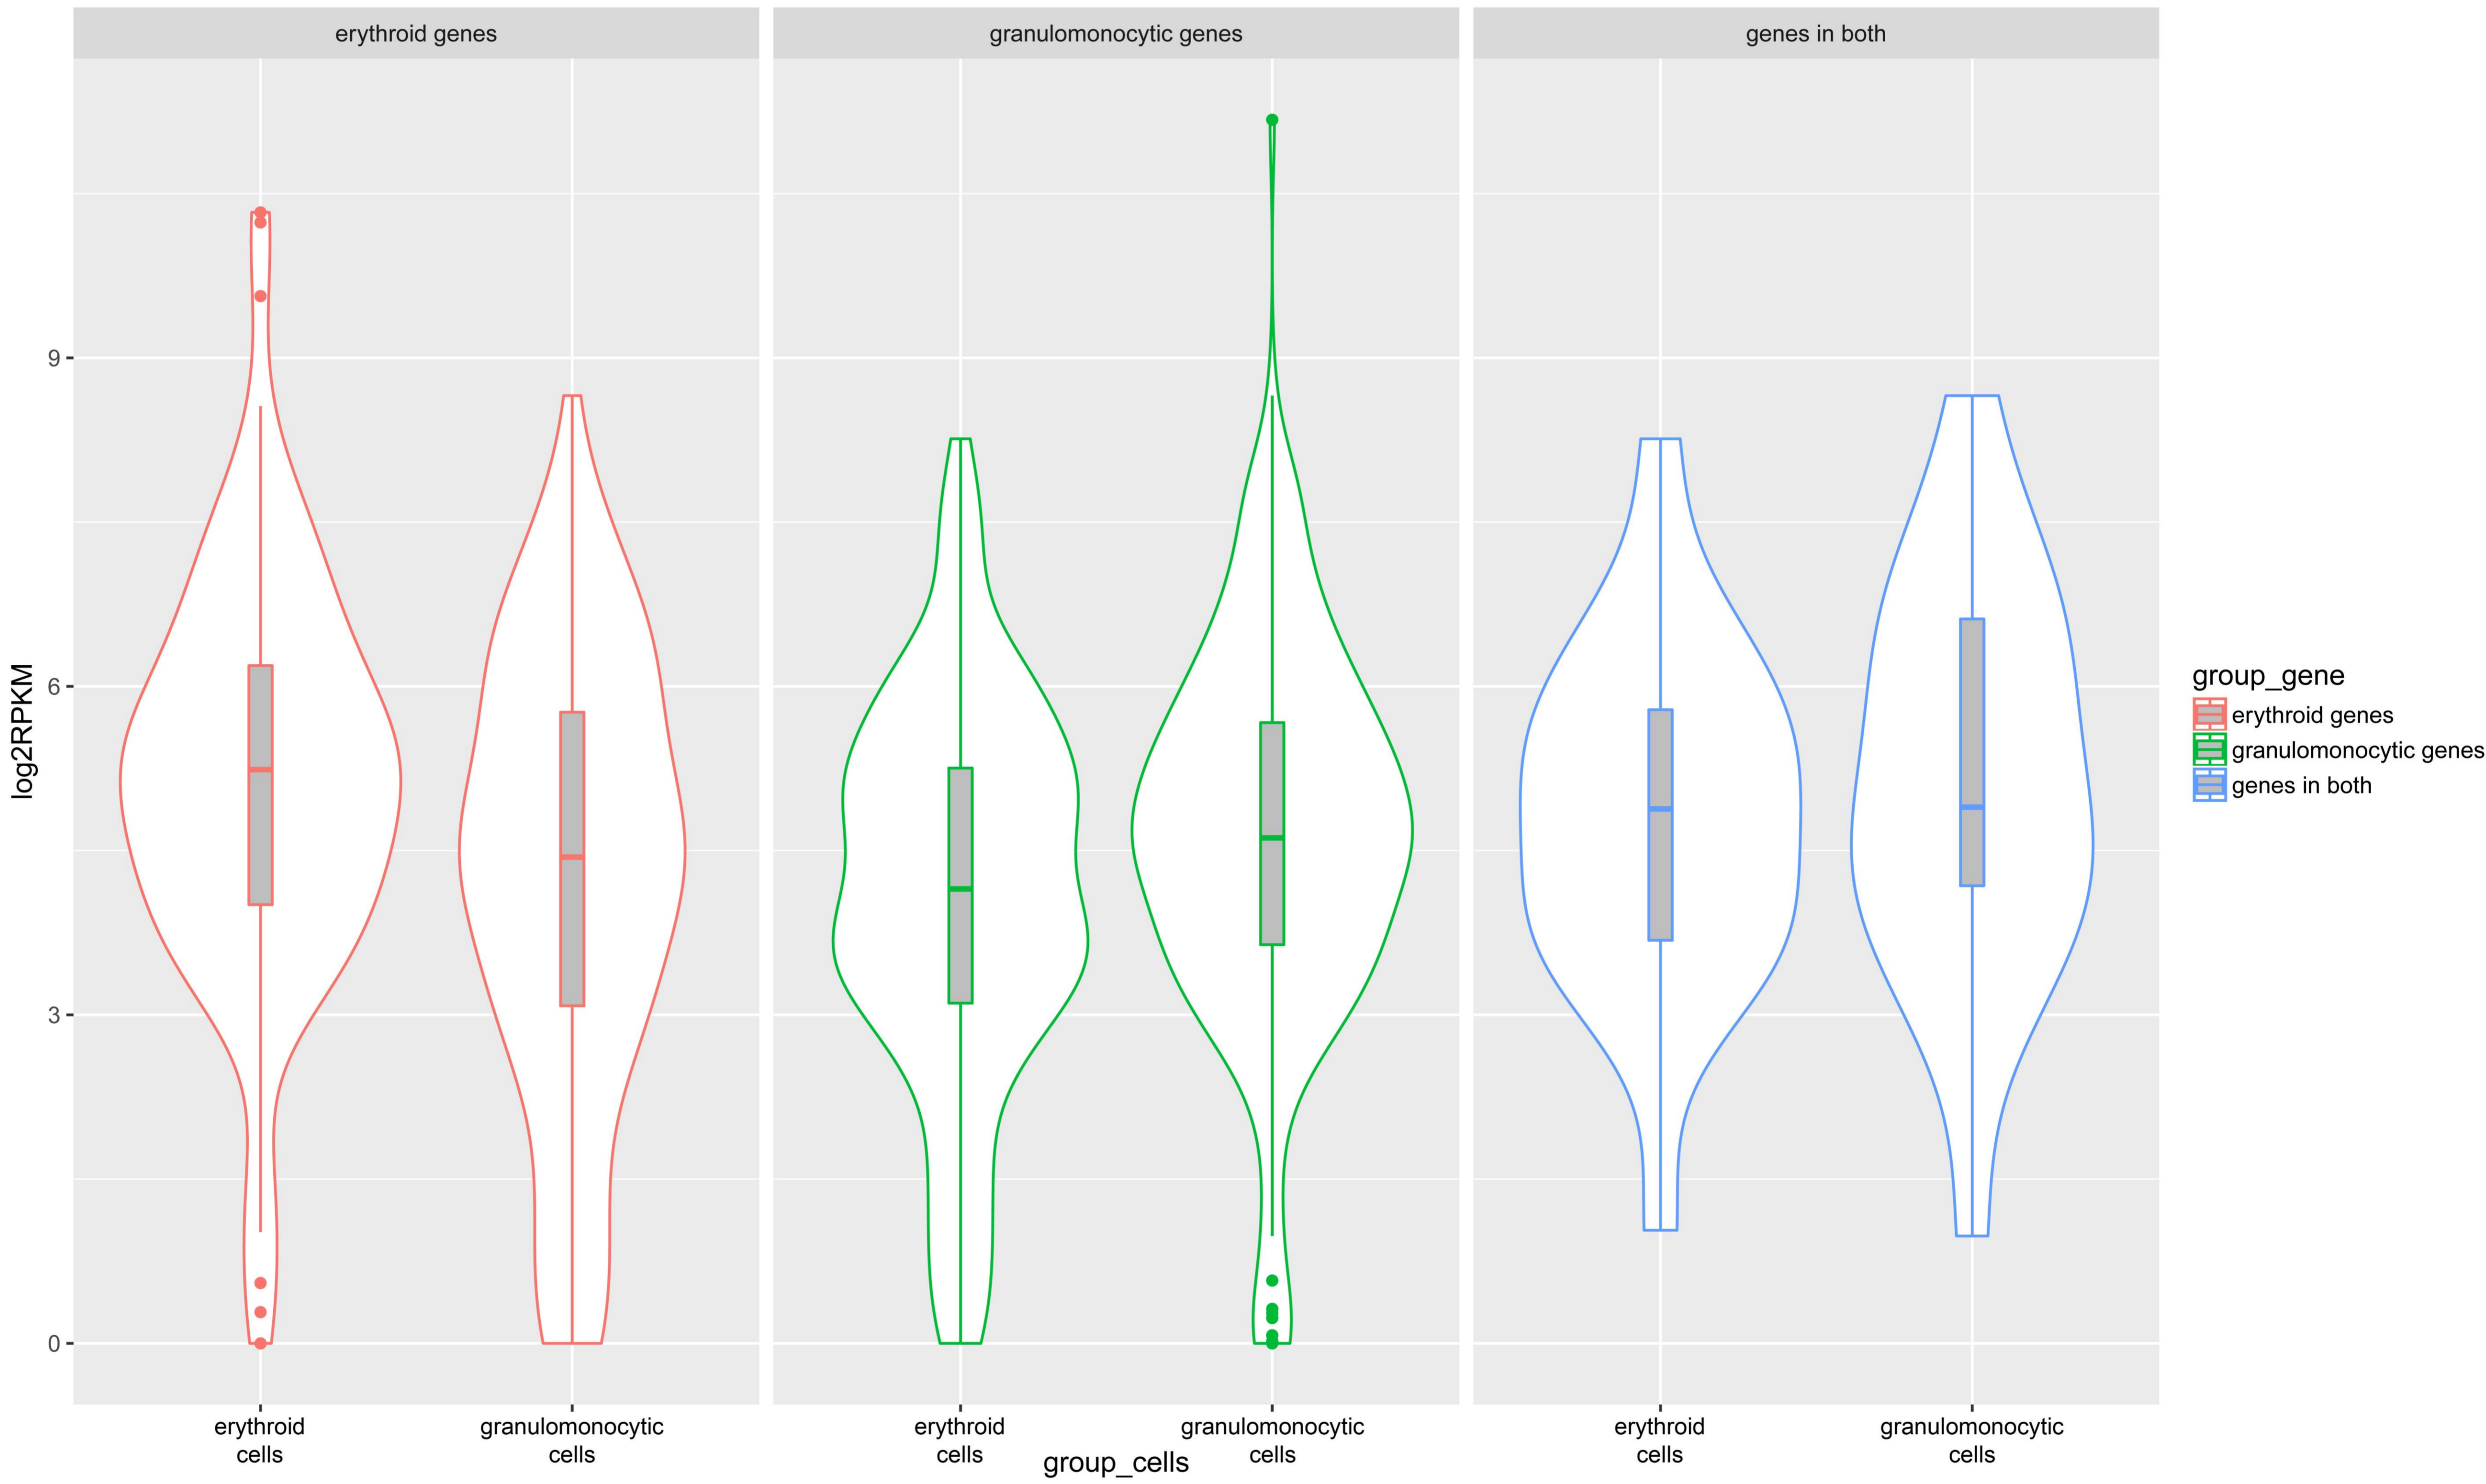

**Supplemental Figure 3. Expression levels of aberrantly spliced genes.** (A) Venn diagrams showing the overlap between genes showing aberrant splicing in erythroid colonies and genes that are expressed in granulomonocytic colonies, and between genes showing aberrant splicing in granulomonocytic colonies and genes that are expressed in erythroid colonies. The large majority of genes aberrantly spliced in either erythroid or granulomonocytic lineage only were also expressed in the other lineage. (B) Violin plots showing the distribution of the expression levels (log2rpkm) of the aberrantly spliced genes identified in our study (from Figure 3F).

Supplemental Figure 4

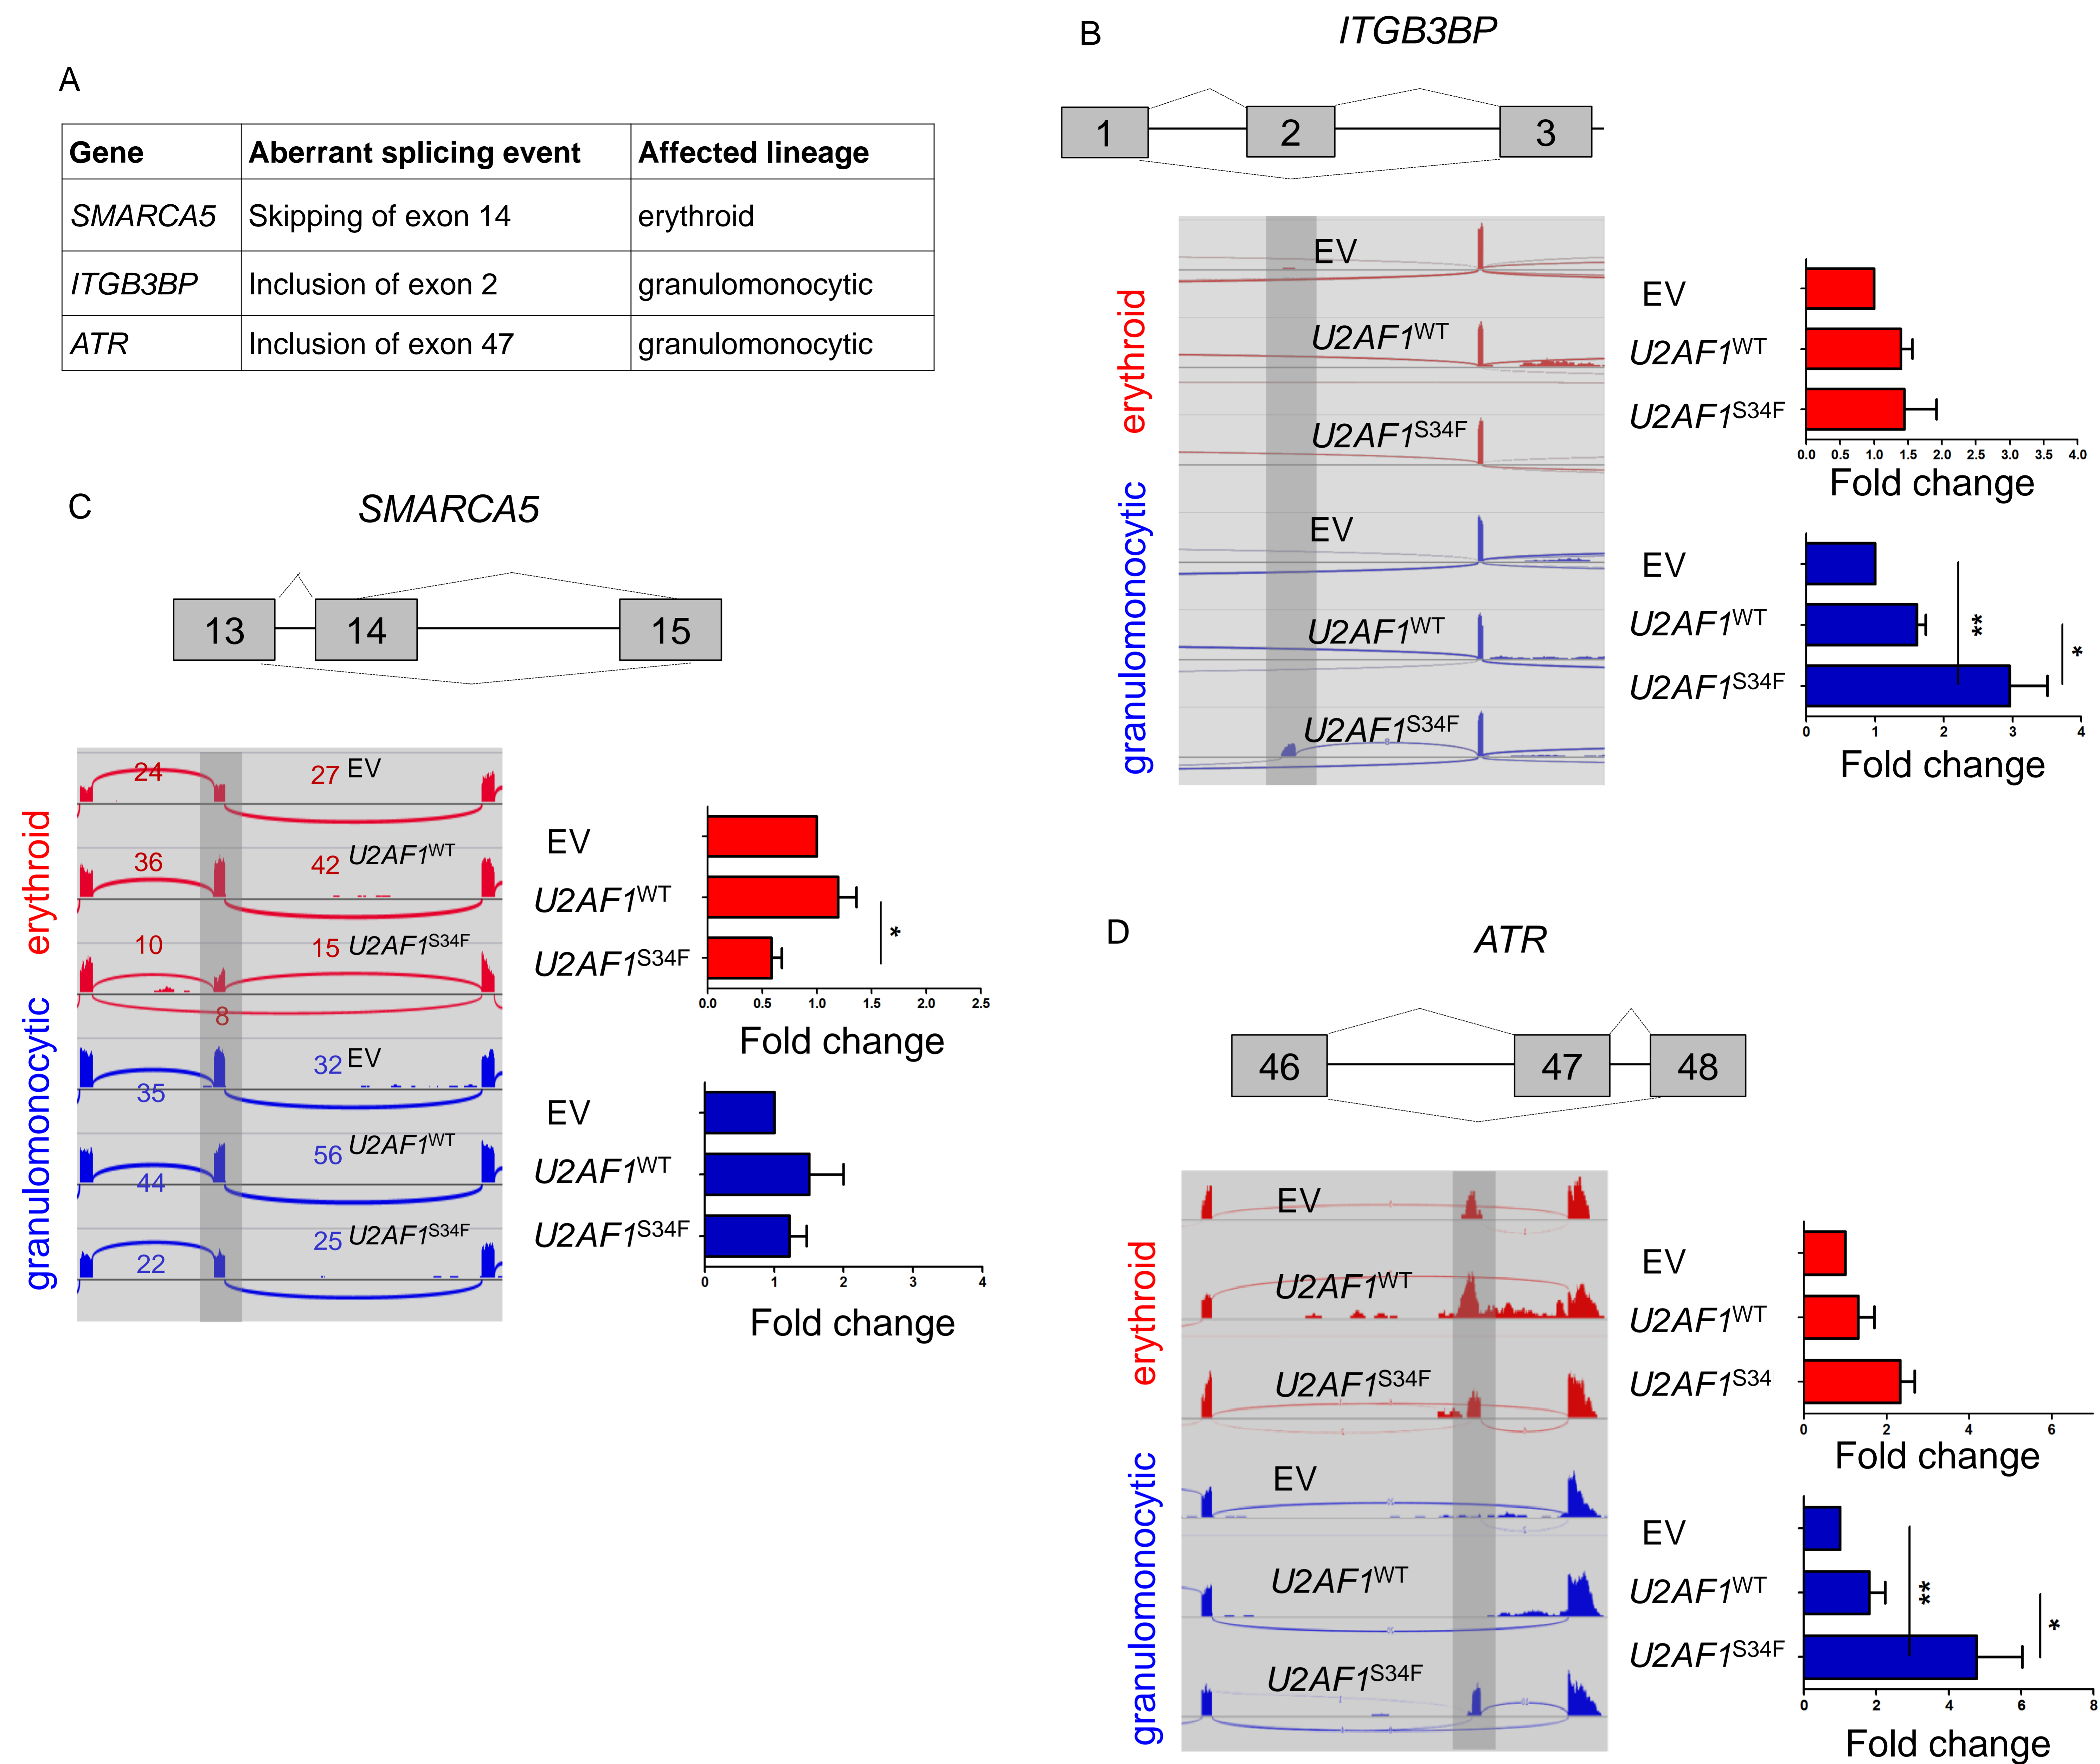

**Supplemental Figure 4. Measurement of lineage-specific splicing alterations in *U2AF1*<sup>S34F</sup> erythroid and granulomonocytic cells by isoform-specific qRT-PCR.** (A) Genes of interest that exhibit differential aberrant splicing between *U2AF1*<sup>S34F</sup> erythroid and granulomonocytic colonies (*ITGB3BP*, *SMARCA5* and *ATR*). Measurement of lineage-specific splicing alteration in (B) *ITGB3BP*, (C) *SMARCA5* and (D) *ATR*. Left panel: sashimi plots illustrating RNA sequencing results of *ITGB3BP*, *SMARCA5* and *ATR* in erythroid and granulomonocytic colonies. For each gene, only the region affected by aberrant splicing is shown and highlighted in grey. Right panels: expression of the isoform associated with aberrant splicing by *U2AF1*<sup>S34F</sup> in transduced cells was measured by isoform-specific qRT-PCR relative to EV and *U2AF1*<sup>WT</sup> control (red bars: erythroid cells; blue bars: granulomonocytic cells). Results in each bar graph were obtained from 5 independent experiments. Bar graphs show mean+SEM. \*P<0.05, 1-way ANOVA with repeated measures using Tukey's post-test.

## H2AFY 1.2

| Query      | Score | Expect                                            | Identities    | Gaps      | Strand    |
|------------|-------|---------------------------------------------------|---------------|-----------|-----------|
| 1369       | 1084  | 0.0                                               | 741/741(100%) | 0/741(0%) | Plus/Plus |
| Query 1    | 60    | GGAAAGTTGGAAAGCATCATACACCCAGCCAAAGAGGATCTCATCCGAC | 60            |           |           |
| Query 364  | 423   | GGAAAGTTGGAAAGCATCATACACCCAGCCAAAGAGGATCTCATCCGAC | 423           |           |           |
| Query 61   | 120   | AAGAGCTTGATCTAAAGAGAGAGAGAGAGAGAGAGAGAGAGAGAGAGAG | 120           |           |           |
| Query 424  | 483   | AAGAGCTTGATCTAAAGAGAGAGAGAGAGAGAGAGAGAGAGAGAGAGAG | 483           |           |           |
| Query 121  | 180   | GGTGAAGTGTATAGAGAGAGAGAGAGAGAGAGAGAGAGAGAGAGAGAG  | 180           |           |           |
| Query 484  | 543   | GGTGAAGTGTATAGAGAGAGAGAGAGAGAGAGAGAGAGAGAGAGAGAG  | 543           |           |           |
| Query 181  | 240   | TTTCAAGTCTCTCCAGAGAGAGAGAGAGAGAGAGAGAGAGAGAGAGAG  | 240           |           |           |
| Query 544  | 603   | TTTCAAGTCTCTCCAGAGAGAGAGAGAGAGAGAGAGAGAGAGAGAGAG  | 603           |           |           |
| Query 241  | 300   | GAATAGATATTTAGCGGCTTGGAGTGGAGAGAGAGAGAGAGAGAGAG   | 300           |           |           |
| Query 604  | 663   | GAATAGATATTTAGCGGCTTGGAGTGGAGAGAGAGAGAGAGAGAGAG   | 663           |           |           |
| Query 301  | 360   | ATTGATCTTAAGATAGATAGAGAGAGAGAGAGAGAGAGAGAGAGAGAG  | 360           |           |           |
| Query 664  | 723   | ATTGATCTTAAGATAGATAGAGAGAGAGAGAGAGAGAGAGAGAGAGAG  | 723           |           |           |
| Query 361  | 420   | GAAGCTGTCTGGAGAGAGAGAGAGAGAGAGAGAGAGAGAGAGAGAGAG  | 420           |           |           |
| Query 724  | 783   | GAAGCTGTCTGGAGAGAGAGAGAGAGAGAGAGAGAGAGAGAGAGAGAG  | 783           |           |           |
| Query 421  | 480   | AGCGAGGAGCATAGAGAGAGAGAGAGAGAGAGAGAGAGAGAGAGAGAG  | 480           |           |           |
| Query 784  | 843   | AGCGAGGAGCATAGAGAGAGAGAGAGAGAGAGAGAGAGAGAGAGAGAG  | 843           |           |           |
| Query 481  | 540   | GGAGAGAGAGAGAGAGAGAGAGAGAGAGAGAGAGAGAGAGAGAGAGAG  | 540           |           |           |
| Query 844  | 903   | GGAGAGAGAGAGAGAGAGAGAGAGAGAGAGAGAGAGAGAGAGAGAGAG  | 903           |           |           |
| Query 541  | 600   | GATAGAGAGAGAGAGAGAGAGAGAGAGAGAGAGAGAGAGAGAGAGAG   | 600           |           |           |
| Query 904  | 963   | GATAGAGAGAGAGAGAGAGAGAGAGAGAGAGAGAGAGAGAGAGAGAG   | 963           |           |           |
| Query 601  | 660   | AAGAGAGAGAGAGAGAGAGAGAGAGAGAGAGAGAGAGAGAGAGAGAG   | 660           |           |           |
| Query 964  | 1023  | AAGAGAGAGAGAGAGAGAGAGAGAGAGAGAGAGAGAGAGAGAGAGAG   | 1023          |           |           |
| Query 661  | 720   | TGCTCTCTCAATAGAGAGAGAGAGAGAGAGAGAGAGAGAGAGAGAGAG  | 720           |           |           |
| Query 1024 | 1083  | TGCTCTCTCAATAGAGAGAGAGAGAGAGAGAGAGAGAGAGAGAGAGAG  | 1083          |           |           |
| Query 721  |       | GTGAGAGAGAGAGAGAGAGAGAGAGAGAGAGAGAGAGAGAGAGAGAG   |               |           |           |
| Query 1084 |       | GTGAGAGAGAGAGAGAGAGAGAGAGAGAGAGAGAGAGAGAGAGAGAG   |               |           |           |
| Query 9    | 68    | GGGAGAGAGAGAGAGAGAGAGAGAGAGAGAGAGAGAGAGAGAGAGAG   | 68            |           |           |
| Query 11   | 70    | GGGAGAGAGAGAGAGAGAGAGAGAGAGAGAGAGAGAGAGAGAGAGAG   | 70            |           |           |
| Query 69   | 128   | CCGAGAGAGAGAGAGAGAGAGAGAGAGAGAGAGAGAGAGAGAGAGAG   | 128           |           |           |
| Query 71   | 130   | CCGAGAGAGAGAGAGAGAGAGAGAGAGAGAGAGAGAGAGAGAGAGAG   | 130           |           |           |
| Query 129  | 188   | GGGAGAGAGAGAGAGAGAGAGAGAGAGAGAGAGAGAGAGAGAGAGAG   | 188           |           |           |
| Query 131  | 190   | GGGAGAGAGAGAGAGAGAGAGAGAGAGAGAGAGAGAGAGAGAGAGAG   | 190           |           |           |
| Query 189  | 248   | CTGAGAGAGAGAGAGAGAGAGAGAGAGAGAGAGAGAGAGAGAGAGAG   | 248           |           |           |
| Query 191  | 250   | CTGAGAGAGAGAGAGAGAGAGAGAGAGAGAGAGAGAGAGAGAGAGAG   | 250           |           |           |
| Query 249  | 310   | CTGAGAGAGAGAGAGAGAGAGAGAGAGAGAGAGAGAGAGAGAGAGAG   | 310           |           |           |
| Query 251  | 368   | CTGAGAGAGAGAGAGAGAGAGAGAGAGAGAGAGAGAGAGAGAGAGAG   | 368           |           |           |
| Query 309  | 370   | CTGAGAGAGAGAGAGAGAGAGAGAGAGAGAGAGAGAGAGAGAGAGAG   | 370           |           |           |
| Query 311  | 428   | CTGAGAGAGAGAGAGAGAGAGAGAGAGAGAGAGAGAGAGAGAGAGAG   | 428           |           |           |
| Query 369  | 480   | CTGAGAGAGAGAGAGAGAGAGAGAGAGAGAGAGAGAGAGAGAGAGAG   | 480           |           |           |
| Query 371  | 490   | CTGAGAGAGAGAGAGAGAGAGAGAGAGAGAGAGAGAGAGAGAGAGAG   | 490           |           |           |
| Query 429  | 548   | CTGAGAGAGAGAGAGAGAGAGAGAGAGAGAGAGAGAGAGAGAGAGAG   | 548           |           |           |
| Query 431  | 550   | CTGAGAGAGAGAGAGAGAGAGAGAGAGAGAGAGAGAGAGAGAGAGAG   | 550           |           |           |
| Query 489  | 608   | CTGAGAGAGAGAGAGAGAGAGAGAGAGAGAGAGAGAGAGAGAGAGAG   | 608           |           |           |
| Query 491  | 610   | CTGAGAGAGAGAGAGAGAGAGAGAGAGAGAGAGAGAGAGAGAGAGAG   | 610           |           |           |
| Query 549  |       | CTGAGAGAGAGAGAGAGAGAGAGAGAGAGAGAGAGAGAGAGAGAGAG   |               |           |           |
| Query 551  |       | CTGAGAGAGAGAGAGAGAGAGAGAGAGAGAGAGAGAGAGAGAGAGAG   |               |           |           |
| Query 609  | 660   | CTGAGAGAGAGAGAGAGAGAGAGAGAGAGAGAGAGAGAGAGAGAGAG   | 660           |           |           |
| Query 611  | 662   | CTGAGAGAGAGAGAGAGAGAGAGAGAGAGAGAGAGAGAGAGAGAGAG   | 662           |           |           |
| Query 1    | 60    | GGGAGAGAGAGAGAGAGAGAGAGAGAGAGAGAGAGAGAGAGAGAGAG   | 60            |           |           |
| Query 801  | 742   | GGGAGAGAGAGAGAGAGAGAGAGAGAGAGAGAGAGAGAGAGAGAGAG   | 742           |           |           |
| Query 61   | 120   | CCGAGAGAGAGAGAGAGAGAGAGAGAGAGAGAGAGAGAGAGAGAGAG   | 120           |           |           |
| Query 741  | 682   | CCGAGAGAGAGAGAGAGAGAGAGAGAGAGAGAGAGAGAGAGAGAGAG   | 682           |           |           |
| Query 121  | 180   | GGGAGAGAGAGAGAGAGAGAGAGAGAGAGAGAGAGAGAGAGAGAGAG   | 180           |           |           |
| Query 681  | 622   | GGGAGAGAGAGAGAGAGAGAGAGAGAGAGAGAGAGAGAGAGAGAGAG   | 622           |           |           |
| Query 181  | 240   | CTGAGAGAGAGAGAGAGAGAGAGAGAGAGAGAGAGAGAGAGAGAGAG   | 240           |           |           |
| Query 621  | 562   | CTGAGAGAGAGAGAGAGAGAGAGAGAGAGAGAGAGAGAGAGAGAGAG   | 562           |           |           |
| Query 241  | 300   | CTGAGAGAGAGAGAGAGAGAGAGAGAGAGAGAGAGAGAGAGAGAGAG   | 300           |           |           |
| Query 301  | 360   | CTGAGAGAGAGAGAGAGAGAGAGAGAGAGAGAGAGAGAGAGAGAGAG   | 360           |           |           |
| Query 361  | 420   | CTGAGAGAGAGAGAGAGAGAGAGAGAGAGAGAGAGAGAGAGAGAGAG   | 420           |           |           |
| Query 421  | 480   | CTGAGAGAGAGAGAGAGAGAGAGAGAGAGAGAGAGAGAGAGAGAGAG   | 480           |           |           |
| Query 441  | 382   | TTTAAAGACAGAGCTCTCTGGAGAGAGAGAGAGAGAGAGAGAGAGAG   | 382           |           |           |
| Query 361  | 420   | TTTAAAGACAGAGCTCTCTGGAGAGAGAGAGAGAGAGAGAGAGAGAG   | 420           |           |           |
| Query 501  | 442   | TTGCTTACAGTCAAGCTGACTCTCTGAGATTTGGAGAGAGAGAGAGAG  | 442           |           |           |
| Query 301  | 360   | TTGCTTACAGTCAAGCTGACTCTCTGAGATTTGGAGAGAGAGAGAGAG  | 360           |           |           |
| Query 501  | 442   | TTGCTTACAGTCAAGCTGACTCTCTGAGATTTGGAGAGAGAGAGAGAG  | 442           |           |           |
| Query 361  | 420   | TTTAAAGACAGAGCTCTCTGGAGAGAGAGAGAGAGAGAGAGAGAGAG   | 420           |           |           |
| Query 441  | 382   | TTTAAAGACAGAGCTCTCTGGAGAGAGAGAGAGAGAGAGAGAGAGAG   | 382           |           |           |
| Query 421  | 480   | GAATAGCTCAAGCTCTCTGAGATTTGGAGAGAGAGAGAGAGAGAGAG   | 480           |           |           |
| Query 361  | 420   | GAATAGCTCAAGCTCTCTGAGATTTGGAGAGAGAGAGAGAGAGAGAG   | 420           |           |           |
| Query 501  | 442   | TTGCTTACAGTCAAGCTGACTCTCTGAGATTTGGAGAGAGAGAGAGAG  | 442           |           |           |
| Query 301  | 360   | TTGCTTACAGTCAAGCTGACTCTCTGAGATTTGGAGAGAGAGAGAGAG  | 360           |           |           |
| Query 501  | 442   | TTGCTTACAGTCAAGCTGACTCTCTGAGATTTGGAGAGAGAGAGAGAG  | 442           |           |           |
| Query 361  | 420   | TTTAAAGACAGAGCTCTCTGGAGAGAGAGAGAGAGAGAGAGAGAGAG   | 420           |           |           |
| Query 441  | 382   | TTTAAAGACAGAGCTCTCTGGAGAGAGAGAGAGAGAGAGAGAGAGAG   | 382           |           |           |
| Query 421  | 480   | GAATAGCTCAAGCTCTCTGAGATTTGGAGAGAGAGAGAGAGAGAGAG   | 480           |           |           |
| Query 361  | 420   | GAATAGCTCAAGCTCTCTGAGATTTGGAGAGAGAGAGAGAGAGAGAG   | 420           |           |           |
| Query 501  | 442   | TTGCTTACAGTCAAGCTGACTCTCTGAGATTTGGAGAGAGAGAGAGAG  | 442           |           |           |
| Query 301  | 360   | TTGCTTACAGTCAAGCTGACTCTCTGAGATTTGGAGAGAGAGAGAGAG  | 360           |           |           |
| Query 501  | 442   | TTGCTTACAGTCAAGCTGACTCTCTGAGATTTGGAGAGAGAGAGAGAG  | 442           |           |           |
| Query 361  | 420   | TTTAAAGACAGAGCTCTCTGGAGAGAGAGAGAGAGAGAGAGAGAGAG   | 420           |           |           |
| Query 441  | 382   | TTTAAAGACAGAGCTCTCTGGAGAGAGAGAGAGAGAGAGAGAGAGAG   | 382           |           |           |
| Query 421  | 480   | GAATAGCTCAAGCTCTCTGAGATTTGGAGAGAGAGAGAGAGAGAGAG   | 480           |           |           |
| Query 361  | 420   | GAATAGCTCAAGCTCTCTGAGATTTGGAGAGAGAGAGAGAGAGAGAG   | 420           |           |           |
| Query 501  | 442   | TTGCTTACAGTCAAGCTGACTCTCTGAGATTTGGAGAGAGAGAGAGAG  | 442           |           |           |
| Query 301  | 360   | TTGCTTACAGTCAAGCTGACTCTCTGAGATTTGGAGAGAGAGAGAGAG  | 360           |           |           |
| Query 501  | 442   | TTGCTTACAGTCAAGCTGACTCTCTGAGATTTGGAGAGAGAGAGAGAG  | 442           |           |           |
| Query 361  | 420   | TTTAAAGACAGAGCTCTCTGGAGAGAGAGAGAGAGAGAGAGAGAGAG   | 420           |           |           |
| Query 441  | 382   | TTTAAAGACAGAGCTCTCTGGAGAGAGAGAGAGAGAGAGAGAGAGAG   | 382           |           |           |
| Query 421  | 480   | GAATAGCTCAAGCTCTCTGAGATTTGGAGAGAGAGAGAGAGAGAGAG   | 480           |           |           |
| Query 361  | 420   | GAATAGCTCAAGCTCTCTGAGATTTGGAGAGAGAGAGAGAGAGAGAG   | 420           |           |           |
| Query 501  | 442   | TTGCTTACAGTCAAGCTGACTCTCTGAGATTTGGAGAGAGAGAGAGAG  | 442           |           |           |
| Query 301  | 360   | TTGCTTACAGTCAAGCTGACTCTCTGAGATTTGGAGAGAGAGAGAGAG  | 360           |           |           |
| Query 501  | 442   | TTGCTTACAGTCAAGCTGACTCTCTGAGATTTGGAGAGAGAGAGAGAG  | 442           |           |           |
| Query 361  | 420   | TTTAAAGACAGAGCTCTCTGGAGAGAGAGAGAGAGAGAGAGAGAGAG   | 420           |           |           |
| Query 441  | 382   | TTTAAAGACAGAGCTCTCTGGAGAGAGAGAGAGAGAGAGAGAGAGAG   | 382           |           |           |
| Query 421  | 480   | GAATAGCTCAAGCTCTCTGAGATTTGGAGAGAGAGAGAGAGAGAGAG   | 480           |           |           |
| Query 361  | 420   | GAATAGCTCAAGCTCTCTGAGATTTGGAGAGAGAGAGAGAGAGAGAG   | 420           |           |           |
| Query 501  | 442   | TTGCTTACAGTCAAGCTGACTCTCTGAGATTTGGAGAGAGAGAGAGAG  | 442           |           |           |
| Query 301  | 360   | TTGCTTACAGTCAAGCTGACTCTCTGAGATTTGGAGAGAGAGAGAGAG  | 360           |           |           |
| Query 501  | 442   | TTGCTTACAGTCAAGCTGACTCTCTGAGATTTGGAGAGAGAGAGAGAG  | 442           |           |           |
| Query 361  | 420   | TTTAAAGACAGAGCTCTCTGGAGAGAGAGAGAGAGAGAGAGAGAGAG   | 420           |           |           |
| Query 441  | 382   | TTTAAAGACAGAGCTCTCTGGAGAGAGAGAGAGAGAGAGAGAGAGAG   | 382           |           |           |
| Query 421  | 480   | GAATAGCTCAAGCTCTCTGAGATTTGGAGAGAGAGAGAGAGAGAGAG   | 480           |           |           |
| Query 361  | 420   | GAATAGCTCAAGCTCTCTGAGATTTGGAGAGAGAGAGAGAGAGAGAG   | 420           |           |           |
| Query 501  | 442   | TTGCTTACAGTCAAGCTGACTCTCTGAGATTTGGAGAGAGAGAGAGAG  | 442           |           |           |
| Query 301  | 360   | TTGCTTACAGTCAAGCTGACTCTCTGAGATTTGGAGAGAGAGAGAGAG  | 360           |           |           |
| Query 501  | 442   | TTGCTTACAGTCAAGCTGACTCTCTGAGATTTGGAGAGAGAGAGAGAG  | 442           |           |           |
| Query 361  | 420   | TTTAAAGACAGAGCTCTCTGGAGAGAGAGAGAGAGAGAGAGAGAGAG   | 420           |           |           |
| Query 441  | 382   | TTTAAAGACAGAGCTCTCTGGAGAGAGAGAGAGAGAGAGAGAGAGAG   | 382           |           |           |
| Query 421  | 480   | GAATAGCTCAAGCTCTCTGAGATTTGGAGAGAGAGAGAGAGAGAGAG   | 480           |           |           |
| Query 361  | 420   | GAATAGCTCAAGCTCTCTGAGATTTGGAGAGAGAGAGAGAGAGAGAG   | 420           |           |           |
| Query 501  | 442   | TTGCTTACAGTCAAGCTGACTCTCTGAGATTTGGAGAGAGAGAGAGAG  | 442           |           |           |
| Query 301  | 360   | TTGCTTACAGTCAAGCTGACTCTCTGAGATTTGGAGAGAGAGAGAGAG  | 360           |           |           |
| Query 501  | 442   | TTGCTTACAGTCAAGCTGACTCTCTGAGATTTGGAGAGAGAGAGAGAG  | 442           |           |           |
| Query 361  | 420   | TTTAAAGACAGAGCTCTCTGGAGAGAGAGAGAGAGAGAGAGAGAGAG   | 420           |           |           |
| Query 441  | 382   | TTTAAAGACAGAGCTCTCTGGAGAGAGAGAGAGAGAGAGAGAGAGAG   | 382           |           |           |
| Query 421  | 480   | GAATAGCTCAAGCTCTCTGAGATTTGGAGAGAGAGAGAGAGAGAGAG   | 480           |           |           |
| Query 361  | 420   | GAATAGCTCAAGCTCTCTGAGATTTGGAGAGAGAGAGAGAGAGAGAG   | 420           |           |           |
| Query 501  | 442   | TTGCTTACAGTCAAGCTGACTCTCTGAGATTTGGAGAGAGAGAGAGAG  | 442           |           |           |
| Query 301  | 360   | TTGCTTACAGTCAAGCTGACTCTCTGAGATTTGGAGAGAGAGAGAGAG  | 360           |           |           |
| Query 501  | 442   | TTGCTTACAGTCAAGCTGACTCTCTGAGATTTGGAGAGAGAGAGAGAG  | 442           |           |           |
| Query 361  | 420   | TTTAAAGACAGAGCTCTCTGGAGAGAGAGAGAGAGAGAGAGAGAGAG   | 420           |           |           |
| Query 441  | 382   | TTTAAAGACAGAGCTCTCTGGAGAGAGAGAGAGAGAGAGAGAGAGAG   | 382           |           |           |
| Query 421  | 480   | GAATAGCTCAAGCTCTCTGAGATTTGGAGAGAGAGAGAGAGAGAGAG   | 480           |           |           |
| Query 361  | 420   | GAATAGCTCAAGCTCTCTGAGATTTGGAGAGAGAGAGAGAGAGAGAG   | 420           |           |           |
| Query 501  | 442   | TTGCTTACAGTCAAGCTGACTCTCTGAGATTTGGAGAGAGAGAGAGAG  | 442           |           |           |
| Query 301  | 360   | TTGCTTACAGTCAAGCTGACTCTCTGAGATTTGGAGAGAGAGAGAGAG  | 360           |           |           |
| Query 501  | 442   | TTGCTTACAGTCAAGCTGACTCTCTGAGATTTGGAGAGAGAGAGAGAG  | 442           |           |           |
| Query 361  | 420   | TTTAAAGACAGAGCTCTCTGGAGAGAGAGAGAGAGAGAGAGAGAGAG   | 420           |           |           |
| Query 441  | 382   | TTTAAAGACAGAGCTCTCTGGAGAGAGAGAGAGAGAGAGAGAGAGAG   | 382           |           |           |
| Query 421  | 480   | GAATAGCTCAAGCTCTCTGAGATTTGGAGAGAGAGAGAGAGAGAGAG   | 480           |           |           |
| Query 361  | 420   | GAATAGCTCAAGCTCTCTGAGATTTGGAGAGAGAGAGAGAGAGAGAG   | 420           |           |           |
| Query 501  | 442   | TTGCTTACAGTCAAGCTGACTCTCTGAGATTTGGAGAGAGAGAGAGAG  | 442           |           |           |
| Query 301  | 360   | TTGCTTACAGTCAAGCTGACTCTCTGAGATTTGGAGAGAGAGAGAGAG  | 360           |           |           |
| Query 501  | 442   | TTGCTTACAGTCAAGCTGACTCTCTGAGATTTGGAGAGAGAGAGAGAG  | 442           |           |           |
| Query 361  | 420   | TTTAAAGACAGAGCTCTCTGGAGAGAGAGAGAGAGAGAGAGAGAGAG   | 420           |           |           |
| Query 441  | 382   | TTTAAAGACAGAGCTCTCTGGAGAGAGAGAGAGAGAGAGAGAGAGAG   | 382           |           |           |
| Query 421  | 480   | GAATAGCTCAAGCTCTCTGAGATTTGGAGAGAGAGAGAGAGAGAGAG   | 480           |           |           |
| Query 361  | 420   | GAATAGCTCAAGCTCTCTGAGATTTGGAGAGAGAGAGAGAGAGAGAG   | 420           |           |           |
| Query 501  | 442   | TTGCTTACAGTCAAGCTGACTCTCTGAGATTTGGAGAGAGAGAGAGAG  | 442           |           |           |
| Query 301  | 360   | TTGCTTACAGTCAAGCTGACTCTCTGAGATTTGGAGAGAGAGAGAGAG  | 360           |           |           |
| Query 501  | 442   | TTGCTTACAGTCAAGCTGACTCTCTGAGATTTGGAGAGAGAGAGAGAG  | 442           |           |           |
| Query 361  | 420   | TTTAAAGACAGAGCTCTCTGGAGAGAGAGAGAGAGAGAGAGAGAGAG   | 420           |           |           |
| Query 441  | 382   | TTTAAAGACAGAGCTCTCTGGAGAGAGAGAGAGAGAGAGAGAGAGAG   | 382           |           |           |
| Query 421  | 480   | GAATAGCTCAAGCTCTCTGAGATTTGGAGAGAGAGAGAGAGAGAGAG   | 480           |           |           |
| Query 361  | 420   | GAATAGCTCAAGCTCTCTGAGATTTGGAGAGAGAGAGAGAGAGAGAG   | 420           |           |           |
| Query 501  | 442   | TTGCTTACAGTCAAGCTGACTCTCTGAGATTTGGAGAGAGAGAGAGAG  | 442           |           |           |
| Query 301  | 360   | TTGCTTACAGTCAAGCTGACTCTCTGAGATTTGGAGAGAGAGAGAGAG  | 360           |           |           |
| Query 501  | 442   | TTGCTTACAGTCAAGCTGACTCTCTGAGATTTGGAGAGAGAGAGAGAG  | 442           |           |           |
| Query 361  | 420   | TTTAAAGACAGAGCTCTCTGGAGAGAGAGAGAGAGAGAGAGAGAGAG   | 420           |           |           |
| Query 441  | 382   | TTTAAAGACAGAGCTCTCTGGAGAGAGAGAGAGAGAGAGAGAGAGAG   | 382           |           |           |
| Query 421  | 480   | GAATAGCTCAAGCTCTCTGAGATTTGGAGAGAGAGAGAGAGAGAGAG   | 480           |           |           |
| Query 361  | 420   | GAATAGCTCAAGCTCTCTGAGATTTGGAGAGAGAGAGAGAGAGAGAG   | 420           |           |           |
| Query 501  | 442   | TTGCTTACAGTCAAGCTGACTCTCTGAGATTTGGAGAGAGAGAGAGAG  | 442           |           |           |
| Query 301  | 360   | TTGCTTACAGTCAAGCTGACTCTCTGAGATTTGGAGAGAGAGAGAGAG  | 360           |           |           |
| Query 501  | 442   | TTGCTTACAGTCAAGCTGACTCTCTGAGATTTGGAGAGAGAGAGAGAG  | 442           |           |           |
| Query 361  | 420   | TTTAAAGACAGAGCTCTCTGGAGAGAGAGAGAGAGAGAGAGAGAGAG   | 420           |           |           |
| Query 441  | 382   | TTTAAAGACAGAGCTCTCTGGAGAGAGAGAGAGAGAGAGAGAGAGAG   | 382           |           |           |
| Query 421  | 480   | GAATAGCTCAAGCTCTCTGAGATTTGGAGAGAGAGAGAGAGAGAGAG   | 480           |           |           |
| Query 361  | 420   | GAATAGCTCAAGCTCTCTGAGATTTGGAGAGAGAGAGAGAGAGAGAG   | 420           |           |           |
| Query 501  | 442   | TTGCTTACAGTCAAGCTGACTCTCTGAGATTTGGAGAGAGAGAGAGAG  | 442           |           |           |
| Query 301  | 360   | TTGCTTACAGTCAAGCTGACTCTCTGAGATTTGGAGAGAGAGAGAGAG  | 360           |           |           |
| Query 501  | 442   | TTGCTTACAGTCAAGCTGACTCTCTGAGATTTGGAGAGAGAGAGAGAG  | 442           |           |           |
| Query 361  | 420   | TTTAAAGACAGAGCTCTCTGGAGAGAGAGAGAGAGAGAGAGAGAGAG   | 420           |           |           |
| Query 441  | 382   | TTTAAAGACAGAGCTCTCTGGAGAGAGAGAGAGAGAGAGAGAGAGAG   | 382           |           |           |
| Query 421  | 480   | GAATAGCTCAAGCTCTCTGAGATTTGGAGAGAGAGAGAGAGAGAGAG   | 480           |           |           |
| Query 361  | 420   | GAATAGCTCAAGCTCTCTGAGATTTGGAGAGAGAGAGAGAGAGAGAG   | 420           |           |           |
| Query 501  | 442   | TTGCTTACAGTCAAGCTGACTCTCTGAGATTTGGAGAGAGAGAGAGAG  | 442           |           |           |
| Query 301  | 360   | TTGCTTACAGTCAAGCTGACTCTCTGAGATTTGGAGAGAGAGAGAGAG  | 360           |           |           |
| Query 501  | 442   | TTGCTTACAGTCAAGCTGACTCTCTGAGATTTGGAGAGAGAGAGAGAG  | 442           |           |           |
| Query 361  | 420   | TTTAAAGACAGAGCTCTCTGGAGAGAGAGAGAGAGAGAGAGAGAGAG   | 420           |           |           |
| Query 441  | 382   | TTTAAAGACAGAGCTCTCTGGAGAGAGAGAGAGAGAGAGAGAGAGAG   | 382           |           |           |
| Query 421  | 480   | GAATAGCTCAAGCTCTCTGAGATTTGGAGAGAGAGAGAGAGAGAGAG   | 480           |           |           |
| Query 361  | 420   | GAATAGCTCAAGCTCTCTGAGATTTGGAGAGAGAGAGAGAGAGAGAG   | 420           |           |           |
| Query 501  | 442   | TTGCTTACAGTCAAGCTGACTCTCTGAGATTTGGAGAGAGAGAGAGAG  | 442           |           |           |
| Query 301  | 360   | TTGCTTACAGTCAAGCTGACTCTCTGAGATTTGGAGAGAGAGAGAGAG  | 360           |           |           |
| Query 501  | 442   | TTGCTTACAGTCAAGCTGACTCTCTGAGATTTGGAGAGAGAGAGAGAG  | 442           |           |           |
| Query 361  | 420   | TTTAAAGACAGAGCTCTCTGGAGAGAGAGAGAGAGAGAGAGAGAGAG   | 420           |           |           |
| Query 441  | 382   | TTTAAAGACAGAGCTCTCTGGAGAGAGAGAGAGAGAGAGAGAGAGAG   | 382           |           |           |
| Query 421  | 480   | GAATAGCTCAAGCTCTCTGAGATTTGGAGAGAGAGAGAGAGAGAGAG   | 480           |           |           |
| Query 361  | 420   | GAATAGCTCAAGCTCTCTGAGATTTGGAGAGAGAGAGAGAGAGAGAG   | 420           |           |           |
| Query 501  | 442   | TTGCTTACAGTCAAGCTGACTCTCTGAGATTTGGAGAGAGAGAGAGAG  | 442           |           |           |
| Query 301  | 360   |                                                   |               |           |           |

## H2AFY 1.1

| Genomic Data Analysis - Strand 1 |                                                                 |               |                                                                |            | Genomic Data Analysis - Strand 2 |                                                                 |               |           |            |                |        |               |           |        |
|----------------------------------|-----------------------------------------------------------------|---------------|----------------------------------------------------------------|------------|----------------------------------|-----------------------------------------------------------------|---------------|-----------|------------|----------------|--------|---------------|-----------|--------|
| Query                            | Score                                                           | Expect        | Identities                                                     | Gaps       | Strand                           | Query                                                           | Score         | Expect    | Identities | Gaps           | Strand |               |           |        |
| 1376 bits(745)                   | 0.0                                                             | 745/745(100%) | 0/745(0%)                                                      | Plus/Minus | 1322 bits(718)                   | 0.0                                                             | 718/718(100%) | 0/718(0%) | Plus/Minus | 1461 bits(791) | 0.0    | 791/791(100%) | 0/791(0%) | Strand |
| Query 1                          | TCACAGGAGGCGGCTTCCTTGGGAGATCTCCAGAGACCTTCCACAAATCTCTGCCACT      | Query 1       | CAGCTTGGGCAATTCCTGAGCAATAGTACTATATCTGTGCTGTCAAAAGAGAGAGATA     | 60         | Query 1                          | GTCGGGGGTGTGTACCCCAATCTCAACCTGGAGCTGTGTAAGGAGAGAGGGGATCTCAAG    | 60            |           |            |                |        |               |           |        |
| Subject 755                      | TCCAGAGGCGCGGCTTCCTTGGGAGATCTCCAGAGACCTTCCACAAATCTCTGCCACT      | Subject 1095  | CAGCTTGGGCAATTCCTGAGCAATAGTACTATATCTGTGCTGTCAAAAGAGAGAGATA     | 1036       | Subject 305                      | GTCGGGGGTGTGTACCCCAATCTCAACCTGGAGCTGTGTAAGGAGAGAGGGGATCTCAAG    | 364           |           |            |                |        |               |           |        |
| Query 61                         | TTCTCTACAGCGTGTCTTACTTACACACCGAGTGAAGAAGTCAGTGTCTGGGGTGA        | Query 61      | CAGCGCTTGGATGGAGAGAGATGTAGAGACAGTAAGTGGAGATGAGCTCTTCAGAT       | 120        | Query 61                         | GAAGATTTGGAGAGAGATCATACACACCGAGCTCAGAGCAAAAGGCAAGTGTCTCCAGA     | 120           |           |            |                |        |               |           |        |
| Subject 695                      | TTCTCTACAGCGTGTCTTACTTACACACCGAGTGAAGAAGTCAGTGTCTGGGGTGA        | Subject 1035  | CAGCGCTTGGATGGAGAGAGATGTAGAGACAGTAAGTGGAGATGAGCTCTTCAGAT       | 976        | Subject 365                      | GAAGATTTGGAGAGAGATCATACACACCGAGCTCAGAGCAAAAGGCAAGTGTCTCCAGA     | 424           |           |            |                |        |               |           |        |
| Query 121                        | ATCGACAGCTATGCTGTGATGTAGAGAGAGTGTACAGCTGTGACAGATCTTGACATCTGGAC  | Query 121     | CAGCTGAGCTGTGTCTGTGGGAAACCTGTCTGCCGCTGTGCGAGATGGAAATGCG        | 180        | Query 121                        | AGAGAGCTGTATCTTAAAGAGCGAGAGAGCAAGAGAGGGGCTCCGGAATCTCAGAGAGAGG   | 180           |           |            |                |        |               |           |        |
| Subject 635                      | ATCGACAGCTATGCTGTGATGTAGAGAGAGTGTACAGCTGTGACAGATCTTGACATCTGGAC  | Subject 975   | CAGCTGAGCTGTGTCTGTGGGAAACCTGTCTGCCGCTGTGCGAGATGGAAATGCG        | 916        | Subject 425                      | AGAGAGCTGTATCTTAAAGAGCGAGAGAGCAAGAGAGGGGCTCCGGAATCTCAGAGAGAGG   | 484           |           |            |                |        |               |           |        |
| Query 181                        | AGGAGAGGCTCTGTGTGGAGAGGAGTGTGAGAGGCTGTGGAGAGTGTGCTGGGTGTG       | Query 181     | AATGGATTTCAAGTCTTATATCTACACCGAGGCTCAGACAGATTTTACGTCTTTTCCAG    | 240        | Query 181                        | GTCAGCTATGAGAGAGCTCAGAGCTGTGAGAGAGCAACAGAGGGGCTCACTGCGGAGGCT    | 240           |           |            |                |        |               |           |        |
| Subject 575                      | AGGAGAGGCTCTGTGTGGAGAGGAGTGTGAGAGGCTGTGGAGAGTGTGCTGGGTGTG       | Subject 915   | AATGGATTTCAAGTCTTATATCTACACCGAGGCTCAGACAGATTTTACGTCTTTTCCAG    | 856        | Subject 485                      | GTCAGCTATGAGAGAGCTCAGAGCTGTGAGAGAGCAACAGAGGGGCTCACTGCGGAGGCT    | 544           |           |            |                |        |               |           |        |
| Query 241                        | CTGTGGAGGCTGTGACTGACTTACATGACTTACCTCTGCTTTGGAAATCTGGGGGCTTTTC   | Query 241     | AAGTCTTCAACTATGTGTGCAGCCCAAGTGGAGCTAATTAAGATGAGATTCAGAACTTGGC  | 300        | Query 241                        | TGACAGTCTCTCTCCACAGAGAGCTCTCTCTGCTCCAGAGATGTGAGAGTGTACAGAGCTG   | 300           |           |            |                |        |               |           |        |
| Subject 515                      | CTGTGGAGGCTGTGACTGACTTACATGACTTACCTCTGCTTTGGAAATCTGGGGGCTTTTC   | Subject 855   | AAGTCTTCAACTATGTGTGCAGCCCAAGTGGAGCTAATTAAGATGAGATTCAGAACTTGGC  | 796        | Subject 545                      | TGACAGTCTCTCTCCACAGAGAGCTCTCTCTGCTCCAGAGATGTGAGAGTGTACAGAGCTG   | 604           |           |            |                |        |               |           |        |
| Query 301                        | TTCGCTCTGCTTTTTTAATTAAGAGCTTCTTCTGGGATGGAGAGACTTGGGCTTTTGGCT    | Query 301     | AGGCAAGGCAATGAGCTGTGTGTGAGACAGAGCTTACATGACTTCCAAAGGGGCTGTCTTTT | 360        | Query 301                        | ACATATGCTCTGATGTGAGAGAGTGTGTGTGTGAGCCAGCAAGACAGTACTTATACATCG    | 360           |           |            |                |        |               |           |        |
| Subject 455                      | TTCGCTCTGCTTTTTTAATTAAGAGCTTCTTCTGGGATGGAGAGACTTGGGCTTTTGGCT    | Subject 795   | AGGCAAGGCAATGAGCTGTGTGTGAGACAGAGCTTACATGACTTCCAAAGGGGCTGTCTTTT | 736        | Subject 695                      | ACATATGCTCTGATGTGAGAGAGTGTGTGTGTGAGCCAGCAAGACAGTACTTATACATCG    | 664           |           |            |                |        |               |           |        |
| Query 361                        | GGGGGTGGTGTGATGGCTTCTCAACTTTCTTTGGATATCCCGCTTCTGTCTAGCAAC       | Query 361     | CCGGAGTCTCAGGAGAGCTTCCCAAAATCTCTTGACACTTTTCTTCTCAGAGTGTTTC     | 420        | Query 361                        | GTCGTGAGGTAGGAGAGCTGTGGAGAGAGAGGTGGCAAGGAGTTTGTGGAGAGCTGTTC     | 420           |           |            |                |        |               |           |        |
| Subject 395                      | GGGGGTGGTGTGATGGCTTCTCAACTTTCTTTGGATATCCCGCTTCTGTCTAGCAAC       | Subject 735   | CCGGAGTCTCAGGAGAGCTTCCCAAAATCTCTTGACACTTTTCTTCTCAGAGTGTTTC     | 676        | Subject 655                      | GTCGTGAGGTAGGAGAGCTGTGGAGAGAGAGGTGGCAAGGAGTTTGTGGAGAGCTGTTC     | 720           |           |            |                |        |               |           |        |
| Query 421                        | TGGGGTGGATGTGTGGGTAGACACACCCCACTGGGTATGGTACTTTTATAGACATGA       | Query 421     | TACTTTCACATGAGATGTAGAGTACAGTGTGTGTGGGTAGACAGAGCATCATGTGAGT     | 480        | Query 421                        | TGGAGCTTCGGAAGAGAGAGGGGCTTGGAGAGTACTGTGAGCTGTCTGTCAAGCTAGGCTC   | 480           |           |            |                |        |               |           |        |
| Subject 335                      | TGGGGTGGATGTGTGGGTAGACACACCCCACTGGGTATGGTACTTTTATAGACATGA       | Subject 675   | TACTTTCACATGAGATGTAGAGTACAGTGTGTGTGGGTAGACAGAGCATCATGTGAGT     | 616        | Subject 725                      | TGGAGCTTCGGAAGAGAGAGGGGCTTGGAGAGTACTGTGAGCTGTCTGTCAAGCTAGGCTC   | 784           |           |            |                |        |               |           |        |
| Query 481                        | TTCAAGCTATCATATTTGAGCAGACAGAGAGATGTGTGGGGGTGTGACCGTGTCTTC       | Query 481     | CGAGGCAATGTCACTGTGTCAACTTTGGACTTGTGGCTCAGAGAGAGAGGCTTGGTGTGA   | 540        | Query 481                        | ATGGCTTGGCTCCCAAGTCTTGTGATATCTGTATATATCTTCAGTTGGGGTGTGAGAGAGT   | 540           |           |            |                |        |               |           |        |
| Subject 275                      | TTCAAGCTATCATATTTGAGCAGACAGAGAGATGTGTGGGGGTGTGACCGTGTCTTC       | Subject 615   | CGAGGCAATGTCACTGTGTCAACTTTGGACTTGTGGCTCAGAGAGAGAGGCTTGGTGTGA   | 556        | Subject 785                      | ATGGCTTGGCTCCCAAGTCTTGTGATATCTGTATATATCTTCAGTTGGGGTGTGAGAGAGT   | 844           |           |            |                |        |               |           |        |
| Query 541                        | TTGTGTCTCTCTGCTGATGTGACAGCAAGCTTCCAGAGATCTTGCGCTGTAGGATATCCAG   | Query 541     | GAGGAGCTGAGAGCGGTGGGCAAGGTGTGCTCTGGTGTGTGTGTGTGTGTGAGCTTGTGCTT | 600        | Query 541                        | GTCAGAGAGCTTGGAGAGAGAGTGAAGAAATGCTTGTGCTCTGTGATGTATAGAGAGC      | 600           |           |            |                |        |               |           |        |
| Subject 215                      | TTGTGTCTCTCTGCTGATGTGACAGCAAGCTTCCAGAGATCTTGCGCTGTAGGATATCCAG   | Subject 555   | GAGGAGCTGAGAGCGGTGGGCAAGGTGTGCTCTGGTGTGTGTGTGTGTGTGAGCTTGTGCTT | 496        | Subject 845                      | GTCAGAGAGCTTGGAGAGAGAGTGAAGAAATGCTTGTGCTCTGTGATGTATAGAGAGC      | 904           |           |            |                |        |               |           |        |
| Query 601                        | ACGGGAGCATGTGATACAGAGGAGTGTGCCCATCTCAATCTGTACTTGGGATGGGCTTTCTTG | Query 601     | ACTGACTTACCGCTGTCTCTTGAATTTTGGGGGCTTTTCTGTGCTCTGTCTTTTATGA     | 660        | Query 601                        | TGAAATGATGATGATTTTCAATCATGTGAGAGAGAGCTAGGAAGGTTTTTCAAGCAGAGAG   | 660           |           |            |                |        |               |           |        |
| Subject 155                      | ACGGGAGCATGTGATACAGAGGAGTGTGCCCATCTCAATCTGTACTTGGGATGGGCTTTCTTG | Subject 495   | ACTGACTTACCGCTGTCTCTTGAATTTTGGGGGCTTTTCTGTGCTCTGTCTTTTATGA     | 436        | Subject 905                      | TGAAATGATGATGATTTTCAATCATGTGAGAGAGAGAGCTAGGAAGGTTTTTCAAGCAGAGAG | 964           |           |            |                |        |               |           |        |
| Query 661                        | ATGTGATGAGAGACTTGGGCGGACGGGAGAGATGATCTCTGTGTGGAGAGAGCTGGAAGCTC  | Query 661     | TATAGAGGCTCTCTTGGAGATGGAGAGCTGTGCTCTTTTGGCTGGGGGTGTGTGATGTG    | 718        | Query 661                        | CAGCTTCAAGCTGTATTTGAGAGGCAATCTCTCAGTACTTGTGTGTACATATGTCTTCTCA   | 720           |           |            |                |        |               |           |        |
| Subject 95                       | ATGTGATGAGAGACTTGGGCGGACGGGAGAGATGATCTCTGTGTGGAGAGAGCTGGAAGCTC  | Subject 435   | TATAGAGGCTCTCTTGGAGATGGAGAGCTGTGCTCTTTTGGCTGGGGGTGTGTGATGTG    | 378        | Subject 955                      | CAGCTTCAAGCTGTATTTGAGAGGCAATCTCTCAGTACTTGTGTGTACATATGTCTTCTCA   | 1024          |           |            |                |        |               |           |        |
| Query 721                        | TTCGGAGAGAGAGAGGAGGAGGAGGAGGAGGAGGAGGAGGAGGAGGAGGAGGAGGAGG      | Query 721     | TTCGGAGAGAGAGAGGAGGAGGAGGAGGAGGAGGAGGAGGAGGAGGAGGAGGAGGAGG     | 780        | Query 721                        | TTCGGAGAGAGAGAGGAGGAGGAGGAGGAGGAGGAGGAGGAGGAGGAGGAGGAGGAGG      | 780           |           |            |                |        |               |           |        |
| Subject 35                       | TTCGGAGAGAGAGAGGAGGAGGAGGAGGAGGAGGAGGAGGAGGAGGAGGAGGAGGAGG      | Subject 1025  | TTCGGAGAGAGAGAGGAGGAGGAGGAGGAGGAGGAGGAGGAGGAGGAGGAGGAGGAGG     | 1084       | Subject 731                      | TTCGGAGAGAGAGAGGAGGAGGAGGAGGAGGAGGAGGAGGAGGAGGAGGAGGAGGAGG      | 766           |           |            |                |        |               |           |        |

# Erythroid

## Forward Sequencing

## Reverse Sequencing

# Granulomonocytic

## Forward Sequencing

## Reverse Sequencing

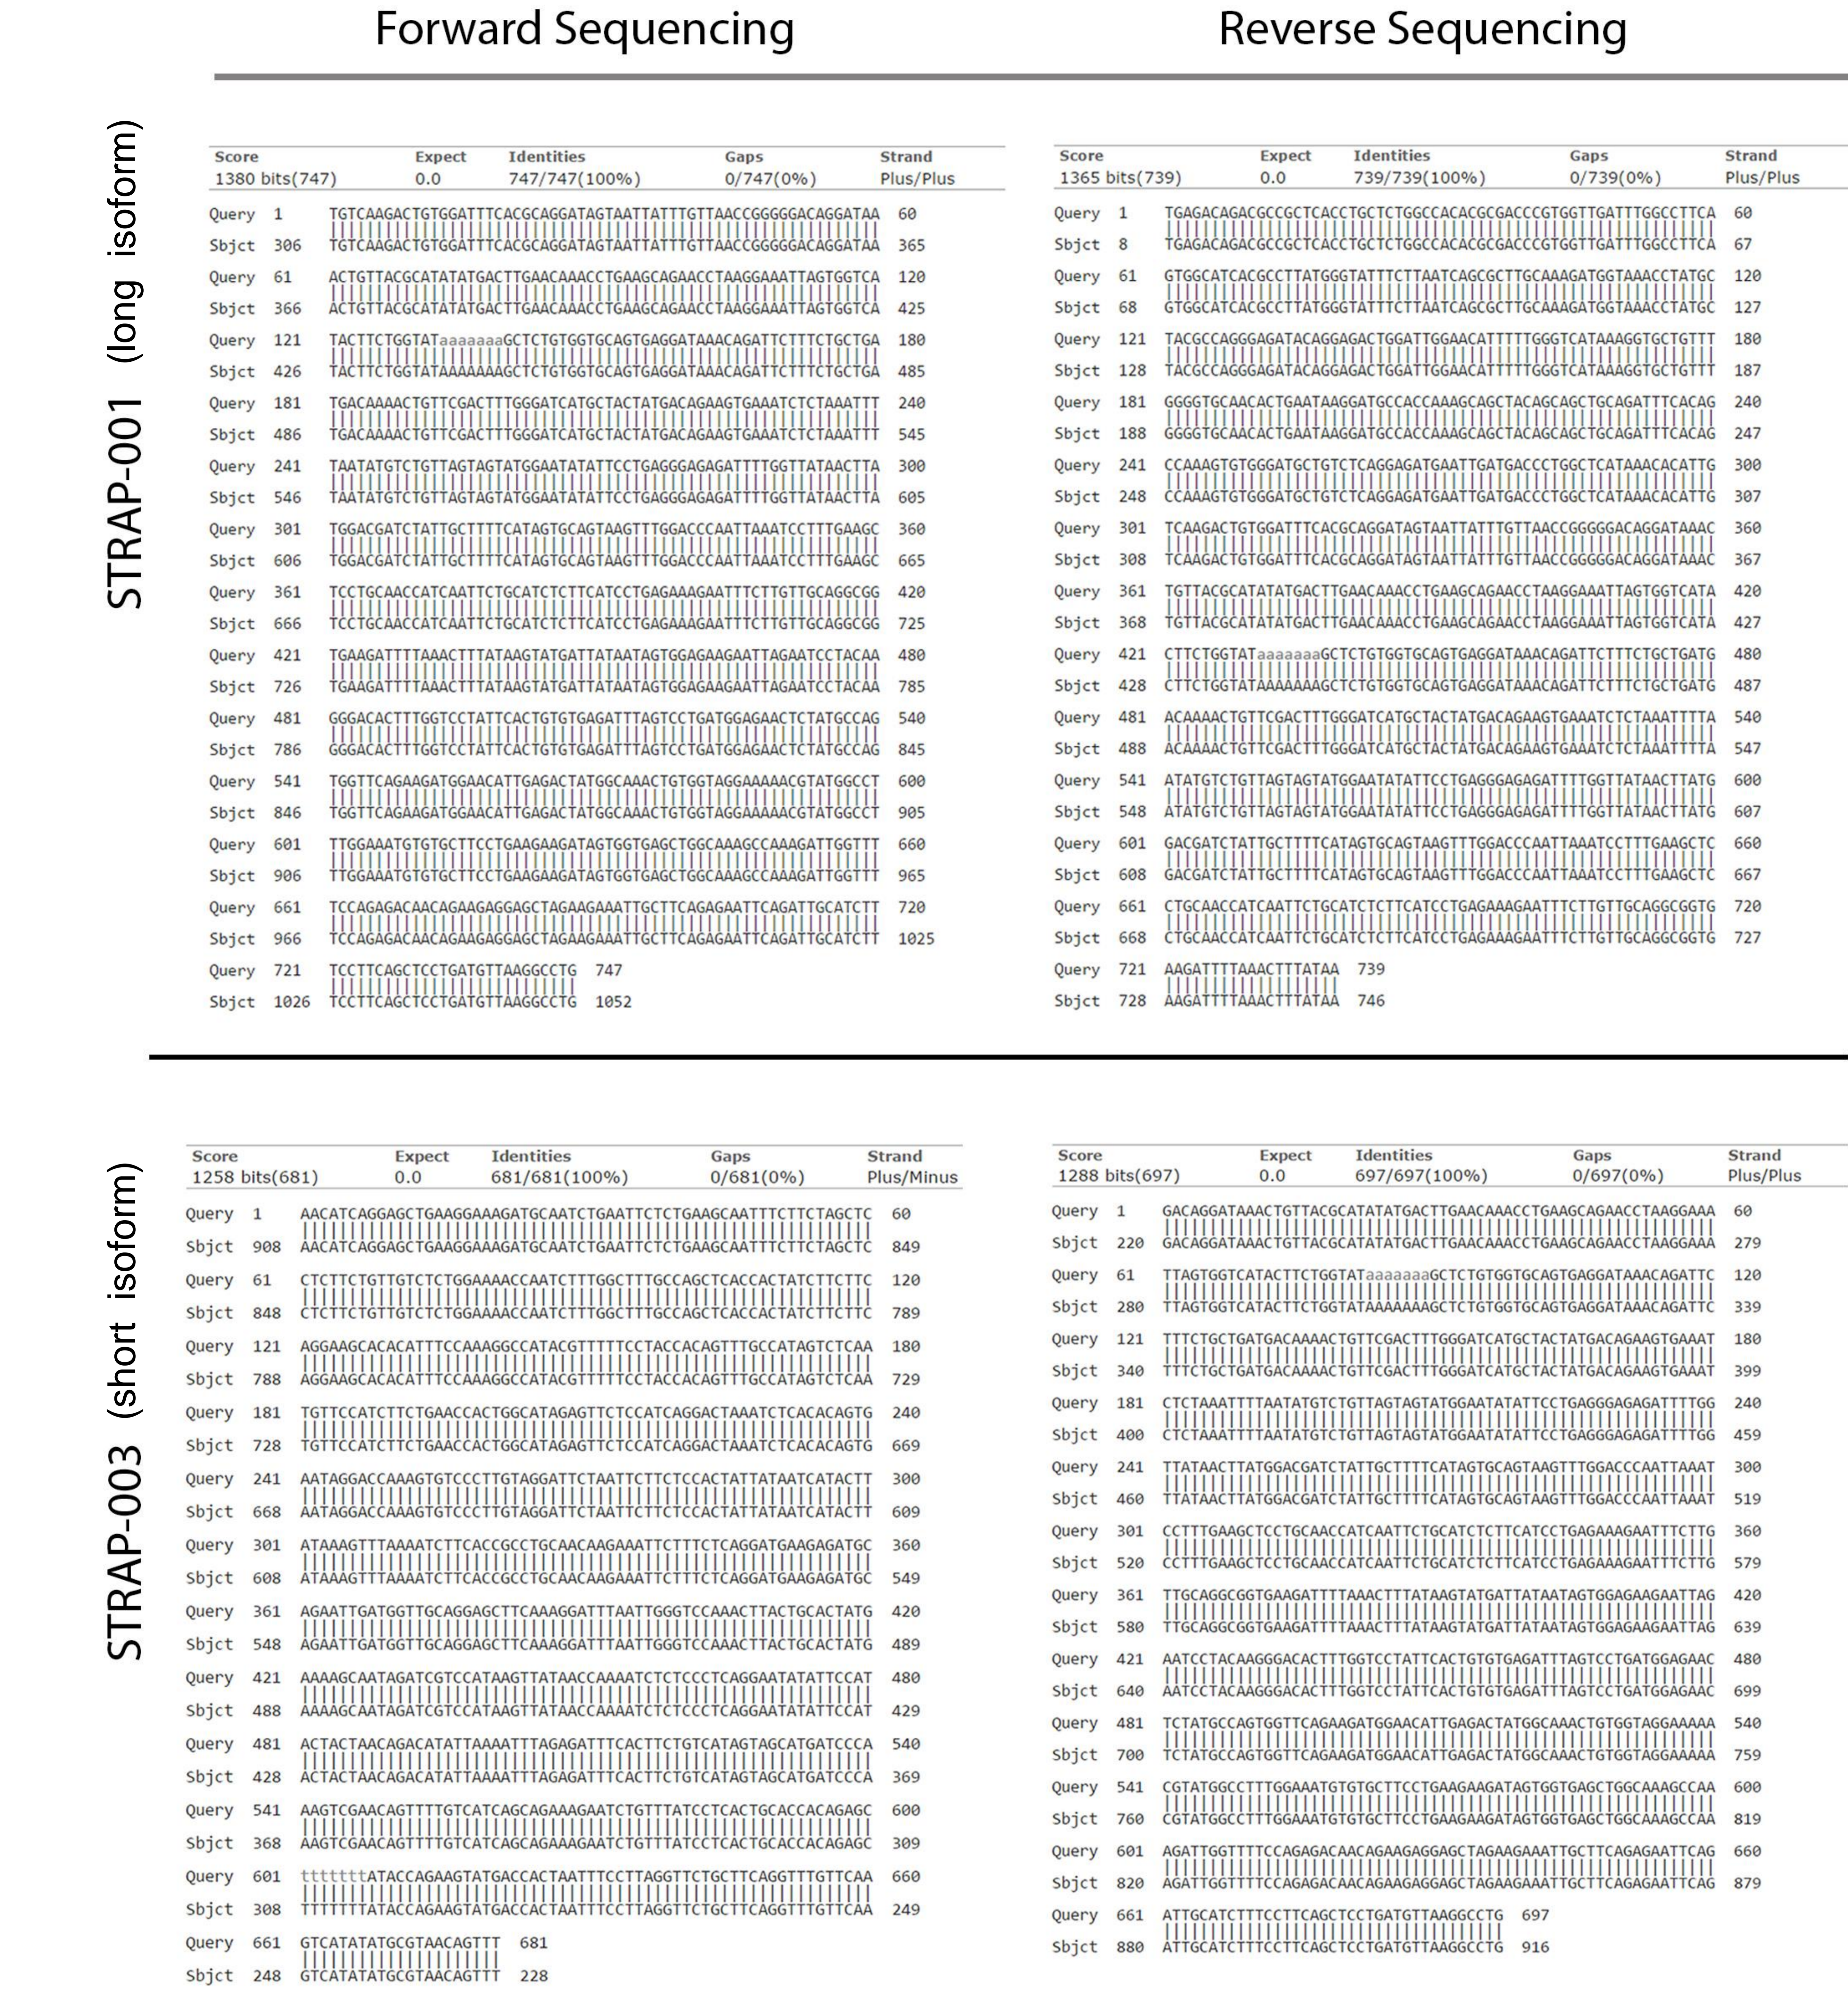

Supplemental Figure 6. Alignment of *STRAP* isoform sequences obtained by Sanger sequencing.

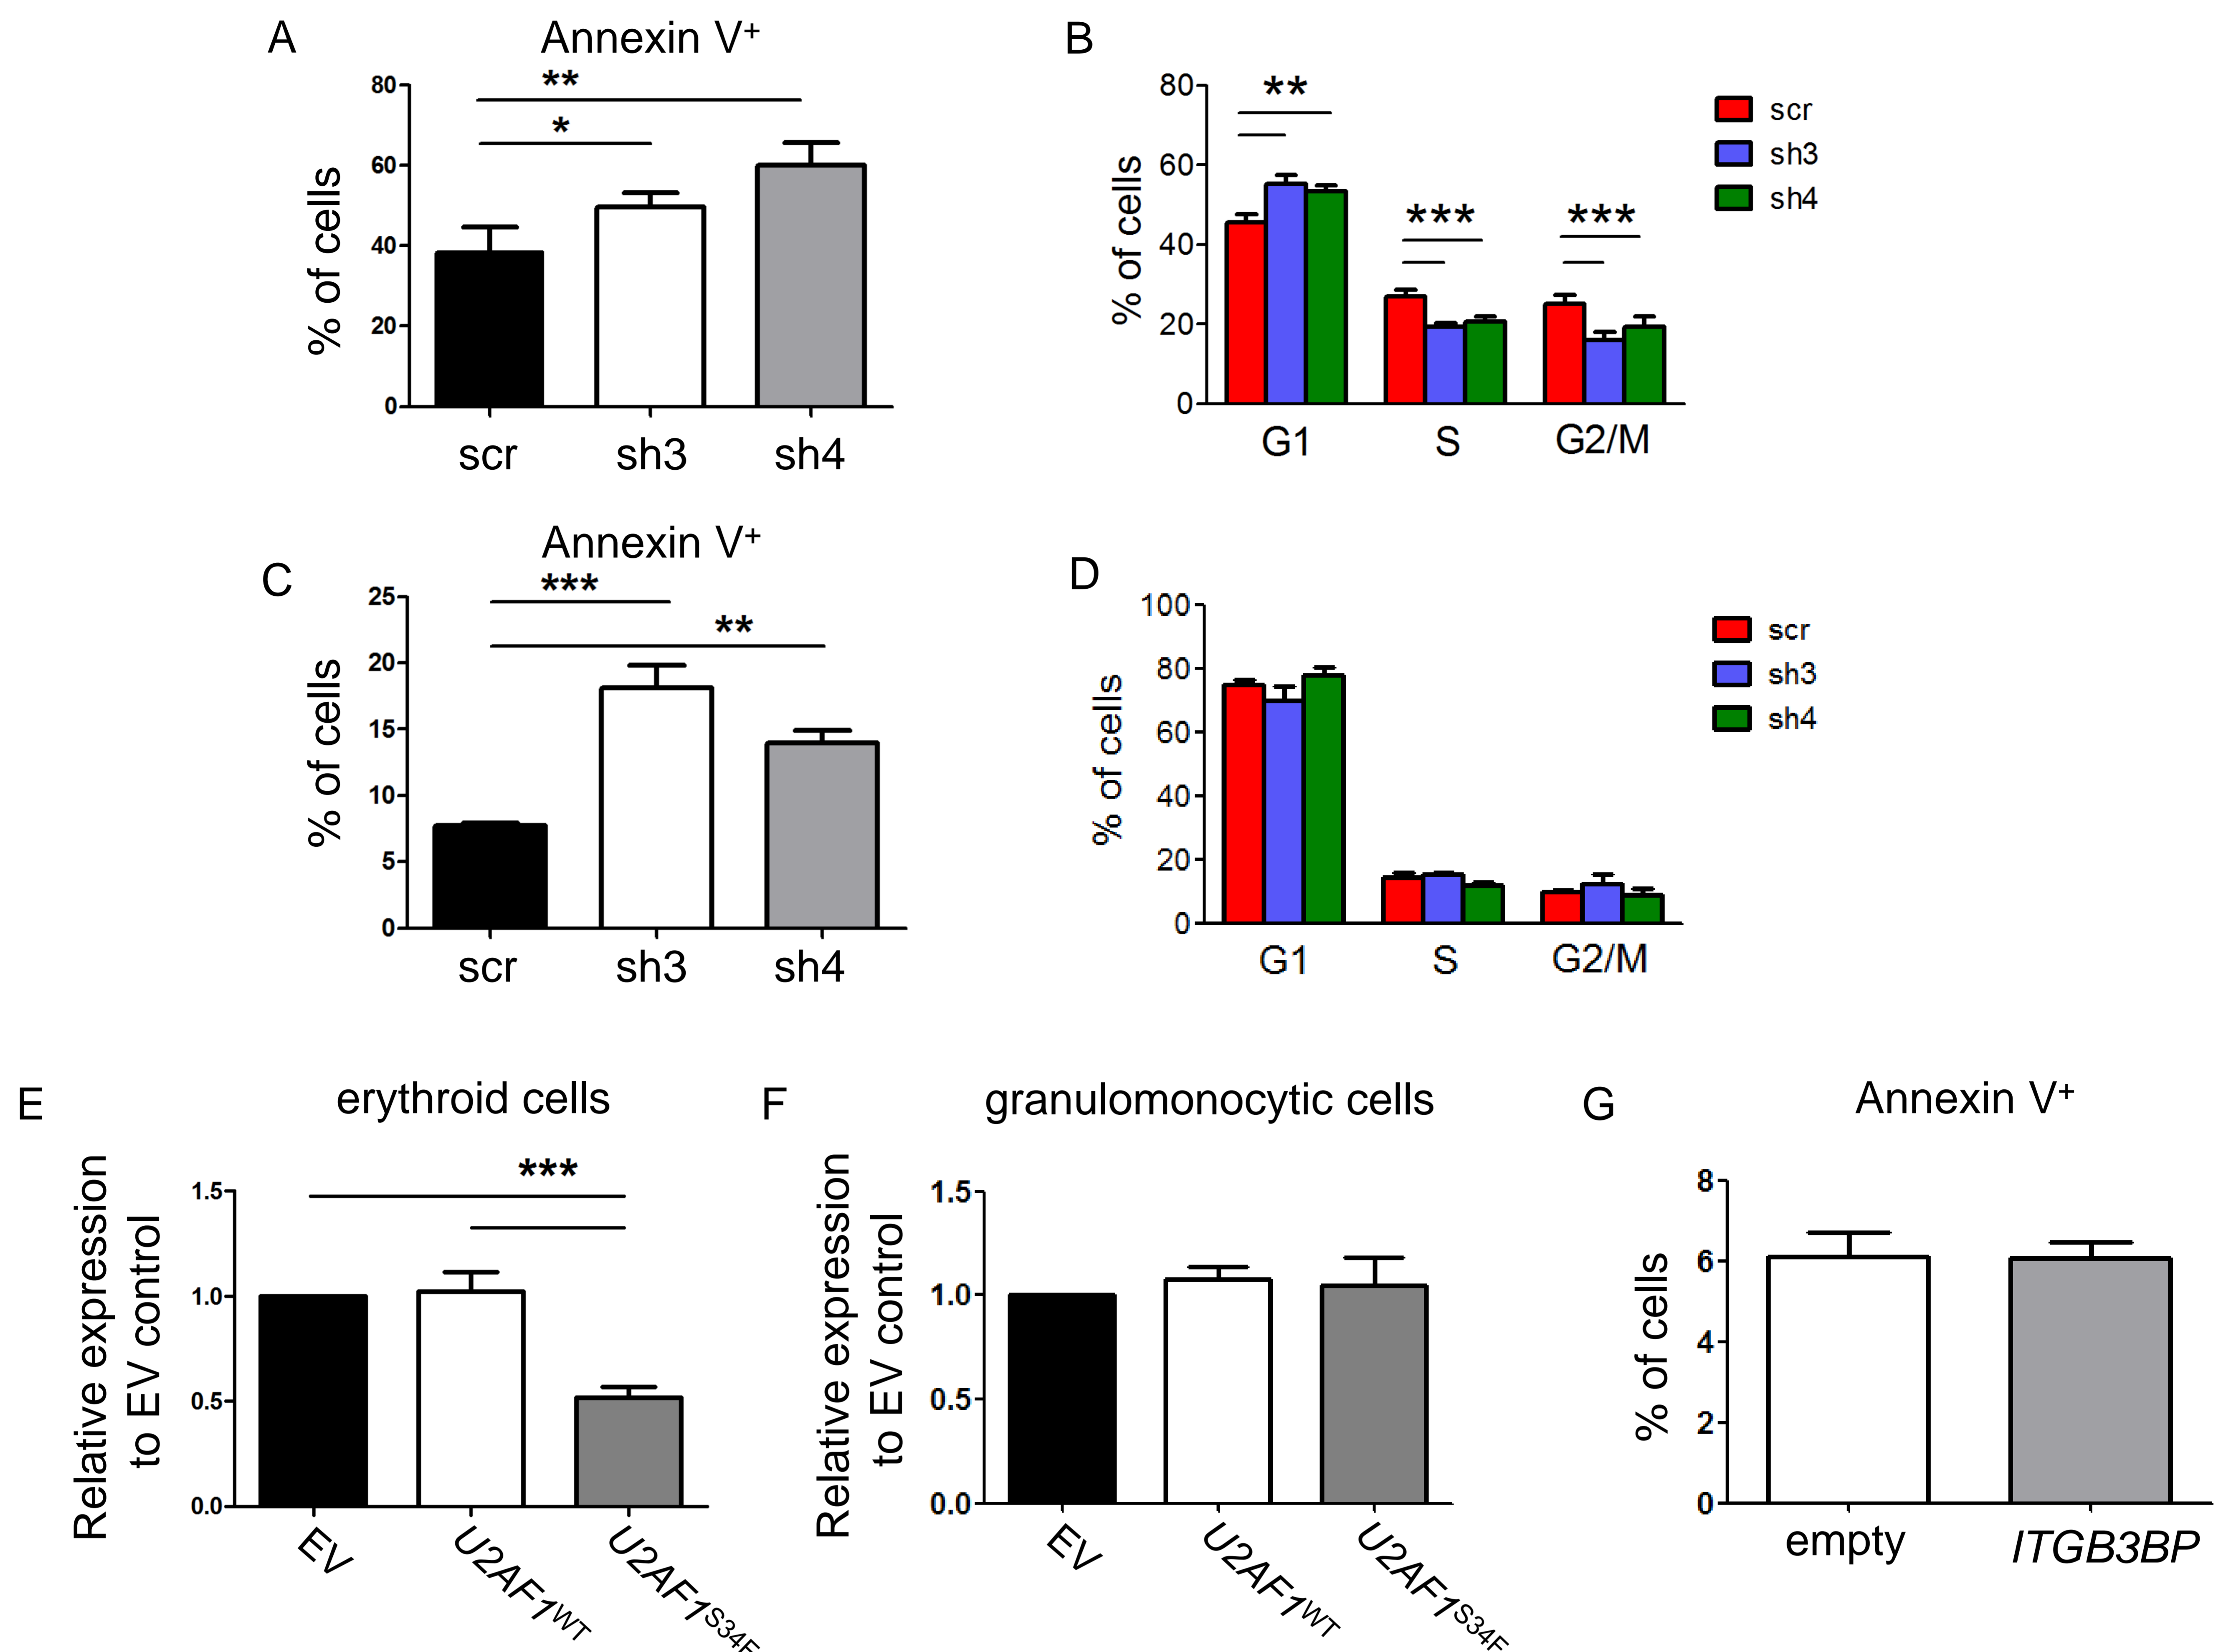

**Supplemental Figure 7. Effects of *H2AFY* isoform 1.1 knockdown, *STRAP* knockdown and *ITGB3BP* overexpression in transduced hematopoietic progenitors differentiated towards the erythroid and granulomonocytic lineages.** (A) Apoptosis measured by Annexin V staining and flow cytometry in transduced erythroid cells with *H2AFY* isoform 1.1 knockdown on day 11 of culture. (B) Cell cycle analysis of transduced erythroid cells with *H2AFY* isoform 1.1 knockdown on day 11 of culture. (C) Apoptosis measured by Annexin V staining and flow cytometry in transduced granulomonocytic cells with *H2AFY* isoform 1.1 knockdown on day 11 of culture. (D) Cell cycle analysis of transduced granulomonocytic cells with *H2AFY* isoform 1.1 knockdown on day 11 of culture. (E) Expression levels of *STRAP* in erythroid cells transduced with EV, *U2AF1*<sup>WT</sup> or *U2AF1*<sup>S34F</sup> determined using qRT-PCR. (F) Expression levels of *STRAP* in granulomonocytic cells transduced with EV, *U2AF1*<sup>WT</sup> or *U2AF1*<sup>S34F</sup> determined using qRT-PCR. (G) Apoptosis measured by Annexin V staining and flow cytometry in transduced granulomonocytic cells with *ITGB3BP* overexpression on day 11 of culture. Results in each bar graph in panel (A), (B), (C) and (D) were obtained from 6 independent experiments. Results in each bar graph in panel (E), (F) and (G) were obtained from 5, 5 and 6 independent experiments respectively. Bar graphs show mean+SEM. P values were calculated by 1-way ANOVA with repeated measures using Tukey's post-test. \*P<0.05, \*\*P<0.01 and \*\*\*P<0.001.

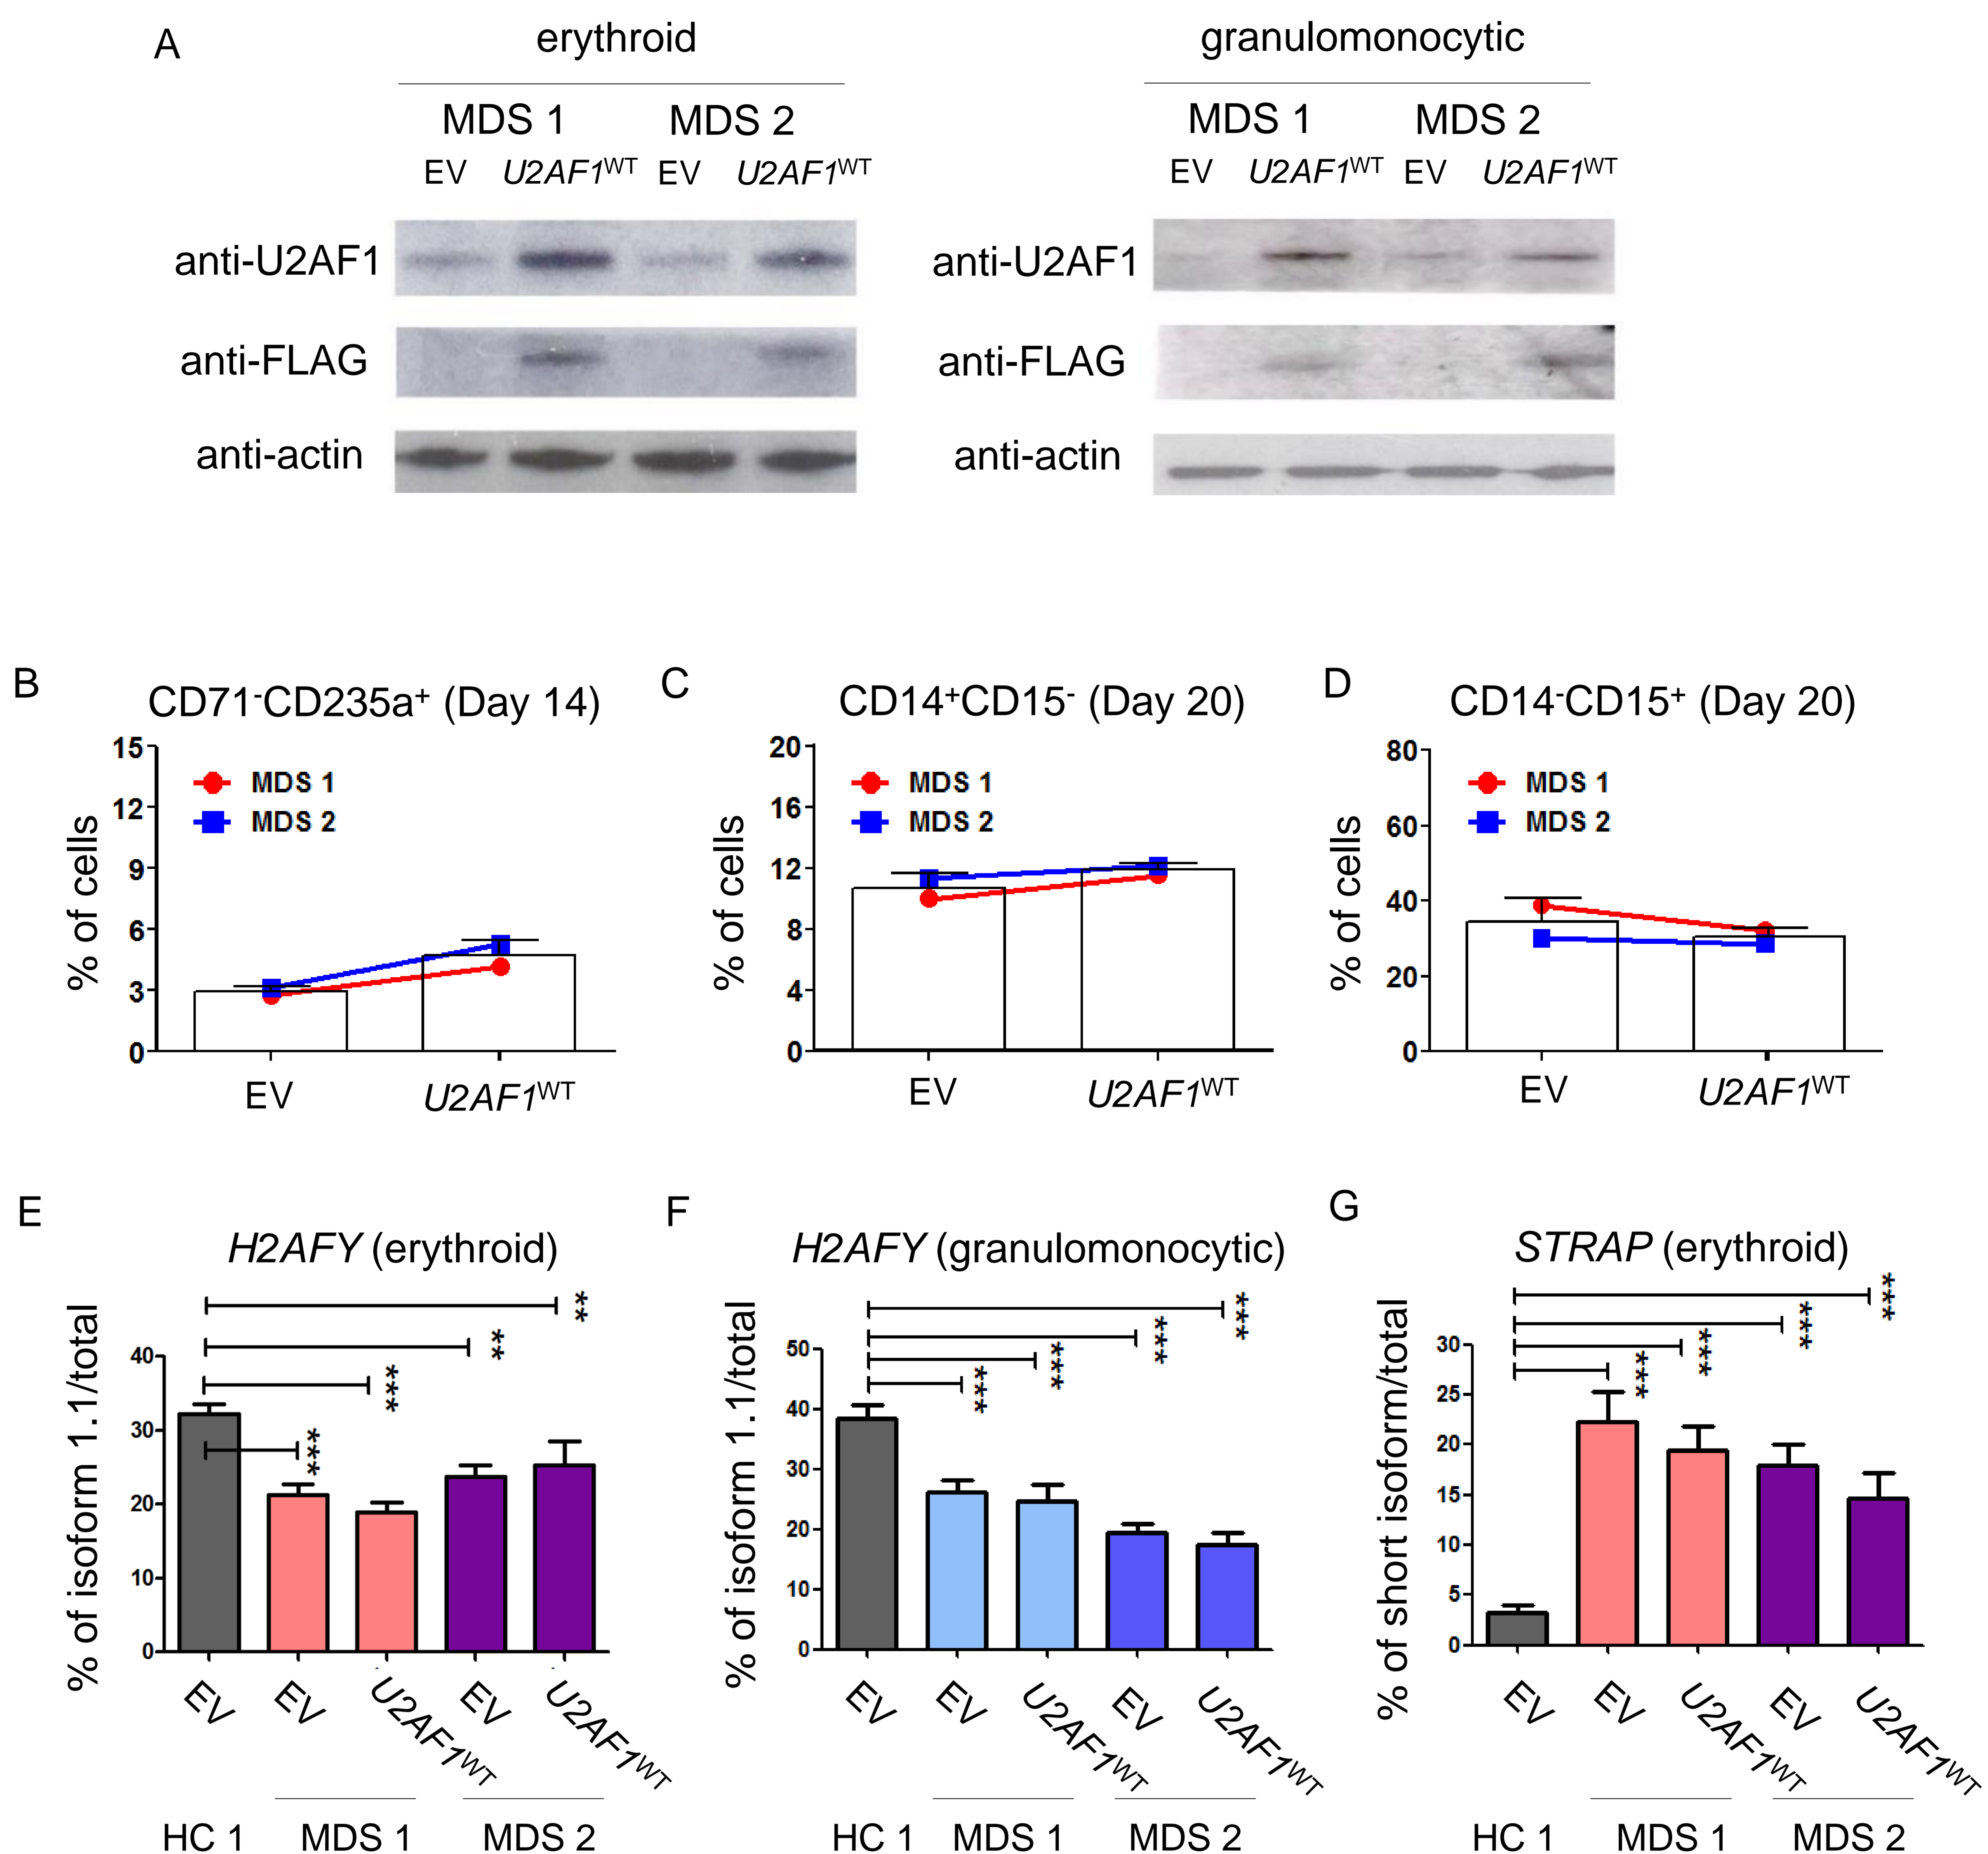

**Supplemental Figure 8. Effects of *U2AF1*<sup>WT</sup> overexpression on *U2AF1*<sup>S34F</sup> MDS hematopoietic progenitors differentiated towards the erythroid and granulomonocytic lineages.** (A) Expression levels of *U2AF1*<sup>WT</sup> in *U2AF1*<sup>S34F</sup> MDS erythroid and granulomonocytic cells (day 11) transduced with EV or *U2AF1*<sup>WT</sup> determined using Western blotting. (B-D) Effects of *U2AF1*<sup>WT</sup> overexpression on erythroid and granulomonocytic differentiation of *U2AF1*<sup>S34F</sup> MDS hematopoietic progenitors. (B) Late erythroid (CD71<sup>+</sup>CD235a<sup>+</sup>) cell population on day 14 of culture, and (C) monocytic (CD14<sup>+</sup>CD15<sup>-</sup>) and (D) granulocytic (CD14<sup>+</sup>CD15<sup>+</sup>) cell populations on day 20 of culture were measured by flow cytometry. (E-F) Ratio of *H2AFY* isoform 1.1 in EV or *U2AF1*<sup>WT</sup> transduced (E) erythroid cells (Day 14) and (F) granulomonocytic cells (Day 20) in culture measured by RT-PCR and gel electrophoresis. (G) Ratio of *STRAP* short isoform in EV or *U2AF1*<sup>WT</sup> transduced erythroid cells (Day 14) in culture was measured by RT-PCR and gel electrophoresis. In panel (E-G), quantification of altered splicing events in gel was performed by ImageJ. Results in each bar graph were obtained from 3 independent experiments in panels (E-G). Results are shown as mean  $\pm$  SEM. P values in panels E-G were calculated by 1-way ANOVA using Tukey's post-test. \*P<0.05, \*\*P<0.01 and \*\*\*P<0.001.

Supplemental Table 1

Sequence of primers used in this study.

| Name                      | Sequence (5'>3')                   | Application                                                               |
|---------------------------|------------------------------------|---------------------------------------------------------------------------|
| <i>U2AF1</i> S34F F       | ATGGCGGAGTATCTGGCCTC               | Sequencing of <i>U2AF1</i> <sup>S34F</sup> mutation                       |
| <i>U2AF1</i> S34F R       | TCAGAATCGCCCAGATCTTT               | Sequencing of <i>U2AF1</i> <sup>S34F</sup> mutation                       |
| <i>H2AFY</i> shRNA 3      | TCGACAGTGATGCTGTCGT                | Knockdown <i>H2AFY</i> isoform 1.1                                        |
| <i>H2AFY</i> shRNA 4      | GTCGTTCACCCGACAAACA                | Knockdown <i>H2AFY</i> isoform 1.1                                        |
| <i>H2AFY</i> isoform1.1 F | CAGGGTGAAGTCAGTAAGGC               | Isoform-specific qRT-PCR and RT-PCR for <i>H2AFY</i> isoform1.1 and total |
| <i>H2AFY</i> isoform1.1 R | CTTCACCACCGATGTAGAAG               | Isoform-specific qRT-PCR and RT-PCR for <i>H2AFY</i> isoform1.1 and total |
| <i>H2AFY</i> isoform1.2 F | CTTTGAGGTGGAGGCCATAA               | Isoform-specific qRT-PCR for <i>H2AFY</i> isoform1.2                      |
| <i>H2AFY</i> isoform1.2 R | CTACTTCCAAGGGCCCGTTC               | Isoform-specific qRT-PCR RT-PCR for <i>H2AFY</i> isoform1.2 and total     |
| <i>STRAP</i> isoform F    | CCTATGCTACGCCAGGGAGATAC            | Isoform-specific qRT-PCR for <i>STRAP</i>                                 |
| <i>STRAP</i> isoform R    | CTGCGTGAAATCCACAGTCTTGAC           | Isoform-specific qRT-PCR for <i>STRAP</i>                                 |
| <i>STRAP</i> ex8 qRT F    | CCTACAAGGGCAACTTTGGTCCTA           | qRT-PCR for <i>STRAP</i>                                                  |
| <i>STRAP</i> ex9 qRT R    | CTAGCTCCTCTTCTGTTGTCTCTGG          | qRT-PCR for <i>STRAP</i>                                                  |
| <i>STRAP</i> ex1 RT F     | AATGAGACAGACGCCGCTCA               | RT-PCR for <i>STRAP</i> long and short isoform                            |
| <i>STRAP</i> ex3 RT R     | CTGCGTGAAATCCACAGTCTTGAC           | RT-PCR for <i>STRAP</i> long and short isoform                            |
| <i>SMARCA5</i> F          | GAGTACTGCAGGTTGGATGGTCAG           | Isoform-specific qRT-PCR for <i>SMARCA5</i>                               |
| <i>SMARCA5</i> R          | ACACTCTGACTGTCTTAGTCTGCCC          | Isoform-specific qRT-PCR for <i>SMARCA5</i>                               |
| <i>ITGB3BP</i> F          | CCGTTCACTGCAACATCTGCT              | Isoform-specific qRT-PCR for <i>ITGB3BP</i>                               |
| <i>ITGB3BP</i> R          | GCTCTTCAGAACTTGTGGGAGA             | Isoform-specific qRT-PCR for <i>ITGB3BP</i>                               |
| <i>ATR</i> F              | TGGAATGGGTCCTATGGGAACAGAGGGT<br>CT | Isoform-specific qRT-PCR for <i>ATR</i>                                   |
| <i>ATR</i> R              | GTTCATCAGGATCCTTGTGAGGC            | Isoform-specific qRT-PCR for <i>ATR</i>                                   |

Supplemental Table 1

Continued

| Name                         | Sequence (5'>3')            | Application                                                               |
|------------------------------|-----------------------------|---------------------------------------------------------------------------|
| <i>H2AFY</i> Cloning F       | GCGGTGGGAAGAAGAAGTCCAC      | Cloning of H2AFY to confirm full length isoform expression                |
| <i>H2AFY</i> Cloning R       | CAGCTTGGCCATTCCTGCAC        | Cloning of H2AFY to confirm full length isoform expression                |
| <i>STRAP</i> Cloning F       | TGAGACAGACGCCGCTCACCT       | Cloning of STRAP to confirm full length isoform expression                |
| <i>STRAP</i> Cloning R       | CAGGCCTTAACATCAGGAGCTGA     | Cloning of STRAP to confirm full length isoform expression                |
| h <i>ATG7</i> _proximal CP F | GCTGCTGAGATCTGGGACAT        | SYBR green qRT-PCR assessment of ATG7 proximal polyadenylation site usage |
| h <i>ATG7</i> _proximal CP R | CAGAGGGGGGAATCCCA           | SYBR green qRT-PCR assessment of ATG7 proximal polyadenylation site usage |
| h <i>ATG7</i> _distal CP F   | GGGCATCGTCTTTCCTGCTA        | SYBR green qRT-PCR assessment of ATG7 distal polyadenylation site usage   |
| h <i>ATG7</i> _distal CP R   | TGGCTACTTTGGGAGAAGCG        | SYBR green qRT-PCR assessment of ATG7 distal polyadenylation site usage   |
| <i>U2AF1</i> pyro F          | TTCAAAATTGGAGCATGTCG        | U2AF1 S34 Pyrosequencing assay                                            |
| <i>U2AF1</i> pyro R          | Biotin- ATGGTCTGGCTAAACGTCG | U2AF1 S34 Pyrosequencing assay                                            |
| <i>U2AF1</i> pyro seq        | AATTGGAGCATGTCGTC           | U2AF1 S34 Pyrosequencing assay                                            |

Supplemental Table 2. RNA-seq quality control metrics.

| Sample ID        | Sample name              | Lane     | Total reads | Total mapped reads | Uniquely mapped number | Intragenic Rate | Intronic Rate | Exonic Rate | Intergenic Rate | Expression Profiling Efficiency | Split Reads | Transcripts Detected | Genes Detected | Mean Per Base Cov. | Mean CV |
|------------------|--------------------------|----------|-------------|--------------------|------------------------|-----------------|---------------|-------------|-----------------|---------------------------------|-------------|----------------------|----------------|--------------------|---------|
| WTCHG_165332_258 | erythroid-empty-1        | one lane | 25546477    | 18616536           | 13535386               | 0.911           | 0.239         | 0.672       | 0.089           | 0.6724                          | 6508934     | 24821                | 12737          | 16.79              | 0.935   |
| WTCHG_171117_277 | erythroid-empty-2        | lane1    | 15065510    | 13093191           | 8799374                | 0.912           | 0.203         | 0.708       | 0.088           | 0.7084                          | 5790416     | 24073                | 12262          | 13.09              | 0.758   |
| WTCHG_172885_277 | erythroid-empty-2        | lane2    | 13372436    | 11592765           | 7790067                | 0.912           | 0.202         | 0.709       | 0.088           | 0.7093                          | 5123537     | 23790                | 12095          | 11.46              | 0.773   |
| WTCHG_171117_278 | erythroid-empty-3        | lane1    | 17861947    | 15460116           | 13198309               | 0.858           | 0.233         | 0.625       | 0.142           | 0.6246                          | 5775406     | 26045                | 13377          | 19.55              | 0.734   |
| WTCHG_172885_278 | erythroid-empty-3        | lane2    | 15959058    | 13798535           | 11784152               | 0.857           | 0.232         | 0.625       | 0.142           | 0.6250                          | 5160843     | 25872                | 13268          | 17.29              | 0.749   |
| WTCHG_165332_260 | erythroid-s34f-1         | one lane | 27811937    | 22175539           | 19260331               | 0.871           | 0.248         | 0.623       | 0.128           | 0.6232                          | 8450704     | 26094                | 13407          | 30.32              | 0.730   |
| WTCHG_171117_257 | erythroid-s34f-2         | lane1    | 18712942    | 16333021           | 12527116               | 0.878           | 0.176         | 0.702       | 0.122           | 0.7021                          | 7175933     | 25724                | 13195          | 20.45              | 0.716   |
| WTCHG_172885_257 | erythroid-s34f-2         | lane2    | 15811020    | 13783768           | 10566838               | 0.877           | 0.175         | 0.702       | 0.123           | 0.7021                          | 6061265     | 25416                | 12997          | 17.40              | 0.720   |
| WTCHG_171117_258 | erythroid-s34f-3         | lane1    | 14814430    | 12767234           | 8009230                | 0.934           | 0.175         | 0.759       | 0.066           | 0.7591                          | 5751814     | 23418                | 11876          | 11.48              | 0.777   |
| WTCHG_172885_258 | erythroid-s34f-3         | lane2    | 15067887    | 12979509           | 8148055                | 0.934           | 0.174         | 0.760       | 0.066           | 0.7598                          | 5848850     | 23489                | 11884          | 11.72              | 0.766   |
| WTCHG_165332_259 | erythroid-wt-1           | one lane | 27279491    | 21159579           | 16365090               | 0.882           | 0.253         | 0.628       | 0.118           | 0.6284                          | 6938049     | 25666                | 13237          | 22.58              | 0.919   |
| WTCHG_171117_279 | erythroid-wt-2           | lane1    | 15471495    | 13766562           | 8681376                | 0.936           | 0.177         | 0.759       | 0.064           | 0.7591                          | 6501764     | 23754                | 12111          | 13.99              | 0.767   |
| WTCHG_172885_279 | erythroid-wt-2           | lane2    | 14636258    | 13017120           | 8181956                | 0.936           | 0.176         | 0.760       | 0.063           | 0.7602                          | 6158388     | 23548                | 12020          | 13.17              | 0.776   |
| WTCHG_171117_280 | erythroid-wt-3           | lane1    | 16170639    | 14000232           | 8840547                | 0.916           | 0.181         | 0.735       | 0.084           | 0.7352                          | 6361189     | 24313                | 12363          | 13.91              | 0.744   |
| WTCHG_172885_280 | erythroid-wt-3           | lane2    | 15049777    | 13012166           | 8180752                | 0.916           | 0.180         | 0.737       | 0.083           | 0.7366                          | 5918893     | 24209                | 12314          | 12.87              | 0.755   |
| WTCHG_165332_261 | granulomonocytic-empty-1 | one lane | 27820205    | 23194583           | 22442598               | 0.884           | 0.188         | 0.697       | 0.115           | 0.6967                          | 9759322     | 26139                | 13462          | 34.91              | 0.802   |
| WTCHG_171117_259 | granulomonocytic-empty-2 | lane1    | 15241845    | 13616677           | 13057942               | 0.872           | 0.246         | 0.626       | 0.127           | 0.6261                          | 5320919     | 25048                | 12834          | 20.05              | 0.730   |
| WTCHG_172885_259 | granulomonocytic-empty-2 | lane2    | 16364139    | 14611988           | 14019233               | 0.873           | 0.246         | 0.627       | 0.127           | 0.6266                          | 5710968     | 25186                | 12916          | 21.59              | 0.742   |
| WTCHG_171117_260 | granulomonocytic-empty-3 | lane1    | 18517334    | 16535205           | 15936610               | 0.890           | 0.202         | 0.688       | 0.110           | 0.6884                          | 7178954     | 25633                | 13123          | 25.15              | 0.771   |
| WTCHG_172885_260 | granulomonocytic-empty-3 | lane2    | 16500313    | 14733089           | 14211779               | 0.890           | 0.201         | 0.689       | 0.110           | 0.6890                          | 6409513     | 25467                | 13048          | 22.48              | 0.773   |
| WTCHG_165332_263 | granulomonocytic-s34f-1  | one lane | 29075241    | 24749666           | 23945787               | 0.889           | 0.218         | 0.671       | 0.111           | 0.6709                          | 10011758    | 26437                | 13617          | 35.78              | 0.770   |
| WTCHG_171117_263 | granulomonocytic-s34f-2  | lane1    | 13525385    | 11544333           | 11020753               | 0.846           | 0.236         | 0.610       | 0.153           | 0.6103                          | 4190498     | 23813                | 12198          | 17.59              | 0.831   |
| WTCHG_172885_263 | granulomonocytic-s34f-2  | lane2    | 14143648    | 12069933           | 11533003               | 0.846           | 0.236         | 0.611       | 0.153           | 0.6106                          | 4381522     | 23834                | 12197          | 18.45              | 0.815   |
| WTCHG_171117_264 | granulomonocytic-s34f-3  | lane1    | 15738365    | 13336318           | 12758067               | 0.838           | 0.271         | 0.567       | 0.162           | 0.5671                          | 4414612     | 24711                | 12693          | 18.55              | 0.803   |
| WTCHG_172885_264 | granulomonocytic-s34f-3  | lane2    | 14343654    | 12141383           | 11627026               | 0.837           | 0.270         | 0.567       | 0.163           | 0.5673                          | 4027735     | 24607                | 12639          | 16.76              | 0.784   |
| WTCHG_165332_262 | granulomonocytic-wt-1    | one lane | 28075831    | 22967423           | 22256097               | 0.872           | 0.164         | 0.707       | 0.128           | 0.7073                          | 9983910     | 24096                | 12362          | 33.07              | 0.782   |
| WTCHG_171117_261 | granulomonocytic-wt-2    | lane1    | 13504521    | 11713391           | 11157958               | 0.850           | 0.294         | 0.556       | 0.149           | 0.5563                          | 3982596     | 24054                | 12323          | 15.93              | 0.791   |
| WTCHG_172885_261 | granulomonocytic-wt-2    | lane2    | 14511454    | 12577442           | 11990629               | 0.851           | 0.294         | 0.556       | 0.149           | 0.5563                          | 4277559     | 24190                | 12369          | 17.09              | 0.813   |
| WTCHG_171117_262 | granulomonocytic-wt-3    | lane1    | 15999726    | 14136893           | 13490820               | 0.880           | 0.184         | 0.696       | 0.120           | 0.6963                          | 6127524     | 25572                | 13071          | 20.82              | 0.797   |
| WTCHG_172885_262 | granulomonocytic-wt-3    | lane2    | 17118242    | 15115345           | 14438060               | 0.880           | 0.184         | 0.697       | 0.119           | 0.6968                          | 6556334     | 25623                | 13132          | 22.24              | 0.780   |
